# Supplementary material for: In Silico Target Prediction of Overexpressed microRNAs from LPS-Challenged Zebrafish (Danio rerio) Treated with the Novel Anti-Inflammatory Peptide TnP
Source: MDPI journal article supplement (doi:10.3390/ijms22137117), 2021-07-01
Supplement: s1 [file s1]

**Supplementary Table S1.** List of predicted target genes of *TnP*-upregulated *Danio rerio* miR-21, miR-122, miR-731, and miR-26 by Diana microT-CDS (miTG score > 0.7) and TargetScanFish (score + context < -0.2).

| miRNA  | Ensembl Target Gene Id | Target gene name         | Target Gene Synonyms                                          | Description                                                                                       | DIANA microT-CDS | TargetScan            |
|--------|------------------------|--------------------------|---------------------------------------------------------------|---------------------------------------------------------------------------------------------------|------------------|-----------------------|
|        |                        |                          |                                                               |                                                                                                   | miTG score       | Total context + score |
| miR-21 | ENSDARG00000008034     | <i>skib</i>              | <i>fc17g02, skiB, wu:fc17g02, wu:fk79g04</i>                  | v-ski avian sarcoma viral oncogene homolog b                                                      | 0.99             | -0.35                 |
| miR-21 | ENSDARG000000021443    | <i>zfp36l1b</i>          | <i>fc06f10, wu:fc06f10, zfp36l1l, zgc:77882</i>               | zinc finger protein 36, C3H type-like 1b                                                          | 0.98             | -0.32                 |
| miR-21 | ENSDARG000000001898    | <i>manea</i>             | <i>fi29h09, wu:fi29h09, zgc:92825</i>                         | mannosidase, endo-alpha                                                                           | 0.96             | -0.60                 |
| miR-21 | ENSDARG000000076566    | <i>kank3</i>             | <i>NBP, Numb-Binding Protein, si:dkeyp-104h9.6</i>            | KN motif and ankyrin repeat domains 3                                                             | 0.96             | -0.21                 |
| miR-21 | ENSDARG000000038845    | <i>ldhd</i>              | <i>wu:fi36b04, zgc:55447</i>                                  | lactate dehydrogenase D                                                                           | 0.96             | -0.65                 |
| miR-21 | ENSDARG000000074812    | <i>fhdcl</i>             | <i>si:ch211-62k15.3</i>                                       | formin homology domain containing 1                                                               | 0.95             | -0.42                 |
| miR-21 | ENSDARG000000008363    | <i>mcl1b</i>             | <i>zgc:109763</i>                                             | MCL1 apoptosis regulator, BCL2 family member b                                                    | 0.94             | -0.25                 |
| miR-21 | ENSDARG000000045160    | <i>msrb1b</i>            | <i>sepx1b, zgc:92822</i>                                      | methionine sulfoxide reductase B1b                                                                | 0.94             | -0.38                 |
| miR-21 | ENSDARG000000045516    | <i>itih2</i>             | <i>id:ibd5015, wu:fb34d10, wu:fb96f01, zgc:56119</i>          | inter-alpha-trypsin inhibitor heavy chain 2                                                       | 0.94             | -0.39                 |
| miR-21 | ENSDARG000000007369    | <i>tcf7l1b</i>           | <i>tcf3b</i>                                                  | transcription factor 7 like 1b                                                                    | 0.94             | -0.37                 |
| miR-21 | ENSDARG000000070781    | <i>gjd2b</i>             | <i>cx35, cx35.1, cx35b, gja9</i>                              | gap junction protein delta 2b                                                                     | 0.93             | -0.54                 |
| miR-21 | ENSDARG000000052594    | <i>nkiras2</i>           | <i>zgc:92870</i>                                              | NFKB inhibitor interacting Ras-like 2                                                             | 0.92             | -0.42                 |
| miR-21 | ENSDARG000000004218    | <i>rnd1b</i>             | <i>Rnd1a, rnd1l, wu:fk50c04, zgc:153089</i>                   | Rho family GTPase 1b                                                                              | 0.90             | -0.45                 |
| miR-21 | ENSDARG000000073883    | <i>clstn3</i>            | <i>si:dkey-197a20.4</i>                                       | calsynenin 3                                                                                      | 0.89             | -0.38                 |
| miR-21 | ENSDARG000000016835    | <i>tcirg1a</i>           | <i>si:dkey-9i23.9, tcirg1</i>                                 | T cell immune regulator 1, ATPase H <sup>+</sup> transporting V0 subunit a3a                      | 0.89             | -0.63                 |
| miR-21 | ENSDARG000000020228    | <i>usf2</i>              | <i>fb12g11, si:dkey-211g8.3, wu:fb12g11</i>                   | upstream transcription factor 2, c-fos interacting                                                | 0.89             | -0.31                 |
| miR-21 | ENSDARG000000075714    | <i>hoatz</i>             | <i>C5H11orf88, si:dkey-27p23.3</i>                            | HOATZ cilia and flagella associated protein                                                       | 0.88             | -0.42                 |
| miR-21 | ENSDARG000000023058    | <i>foxo3a</i>            | <i>fb50g02, fi33f07, wu:fb50g02, wu:fi33f07, zgc:92176</i>    | forkhead box O3A                                                                                  | 0.88             | -0.26                 |
| miR-21 | ENSDARG000000011879    | <i>foxn1</i>             | <i>nude, whnb</i>                                             | forkhead box N1                                                                                   | 0.87             | -0.52                 |
| miR-21 | ENSDARG000000005343    | <i>ccdc85a1</i>          | <i>si:dkey-277e10.1, zgc:92780</i>                            | coiled-coil domain containing 85A, like                                                           | 0.86             | -0.38                 |
| miR-21 | ENSDARG000000042029    | <i>mbd3b</i>             | <i>cb357, cb99, sb:cb357, sb:cb99, wu:fc41c05, zgc:111851</i> | methyl-CpG binding domain protein 3b                                                              | 0.86             | -0.34                 |
| miR-21 | ENSDARG000000090072    | <i>CU462878.2</i>        | <i>KRTCAP3</i>                                                | keratinocyte associated protein 3                                                                 | 0.85             | -0.21                 |
| miR-21 | ENSDARG000000075532    | <i>slc4a11</i>           | <i>si:dkey-12j14.4</i>                                        | solute carrier family 4 member 11                                                                 | 0.85             | -0.31                 |
| miR-21 | ENSDARG0000000036457   | <i>cacng6a</i>           | <i>si:dkey-234p10.2</i>                                       | calcium channel, voltage-dependent, gamma subunit 6a                                              | 0.85             | -0.36                 |
| miR-21 | ENSDARG000000022768    | <i>gid8a</i>             | <i>zgc:73100</i>                                              | GID complex subunit 8 homolog a                                                                   | 0.85             | -0.40                 |
| miR-21 | ENSDARG000000043482    | <i>b3gnt3.1</i>          | <i>zgc:136488, zgc:86586</i>                                  | UDP-GlcNAc:betaGal beta-1,3-N-acetylglucosaminyltransferase 3, tandem duplicate 1                 | 0.85             | -0.38                 |
| miR-21 | ENSDARG000000042368    | <i>kif26aa</i>           | <i>si:dkey-31d8.1</i>                                         | kinesin family member 26Aa                                                                        | 0.85             | -0.30                 |
| miR-21 | ENSDARG000000008904    | <i>smarca2</i>           | <i>wu:fa56c07, wu:fi27f11, zgc:66238</i>                      | SWI/SNF related, matrix associated, actin dependent regulator of chromatin, subfamily a, member 2 | 0.84             | -0.31                 |
| miR-21 | ENSDARG000000074262    | <i>nck1a</i>             | <i>si:dkey-4m11.4, nck1</i>                                   | NCK adaptor protein 1a                                                                            | 0.83             | -0.30                 |
| miR-21 | ENSDARG000000002013    | <i>grb10a</i>            | <i>grb10, zgc:91987</i>                                       | growth factor receptor-bound protein 10a                                                          | 0.83             | -0.31                 |
| miR-21 | ENSDARG000000052957    | <i>plcd3a</i>            | <i>DrPLC-delta 3A, zgc:158396</i>                             | phospholipase C, delta 3a                                                                         | 0.83             | -0.29                 |
| miR-21 | ENSDARG000000090914    | <i>si:ch211-117k10.3</i> | <i>klf15l, AL929286.1</i>                                     | <i>si:ch211-117k10.3</i> ; orthologous to human KLF15 (Kruppel like factor 15)                    | 0.83             | -0.34                 |
| miR-21 | ENSDARG000000076913    | <i>emel</i>              | <i>fc30c07, wu:fc30c07</i>                                    | essential meiotic structure-specific endonuclease 1                                               | 0.82             | -0.34                 |
| miR-21 | ENSDARG000000052091    | <i>rbpjb</i>             | <i>Su(H)2</i>                                                 | recombination signal binding protein for immunoglobulin kappa J region b                          | 0.82             | -0.23                 |
| miR-21 | ENSDARG0000000005943   | <i>htra4</i>             | <i>si:dkey-49o11.4</i>                                        | HtrA serine peptidase 4                                                                           | 0.81             | -0.31                 |
| miR-21 | ENSDARG000000037421    | <i>egr1</i>              | <i>etID309970.14, krox-24, krox24, wu:ff64b05, wu:fq25f01</i> | early growth response 1                                                                           | 0.81             | -0.22                 |
| miR-21 | ENSDARG000000026236    | <i>zgc:56585</i>         | <i>zgc:77077</i>                                              | <i>zgc:56585</i> ; orthologous to human HPGD (15-hydroxyprostaglandin dehydrogenase).             | 0.81             | -0.37                 |
| miR-21 | ENSDARG0000000088022   | <i>mhc1zfa</i>           | N/A                                                           | major histocompatibility complex class I ZFA                                                      | 0.81             | -0.24                 |
| miR-21 | ENSDARG000000002006    | <i>rxrb</i>              | <i>NR2B2-B, rxrd, unp286</i>                                  | retinoid x receptor, beta b                                                                       | 0.81             | -0.28                 |
| miR-21 | ENSDARG000000039423    | <i>AL1</i>               | <i>si:ch211-217g15.3</i>                                      | <i>si:ch211-217g15.3</i>                                                                          | 0.81             | -0.34                 |
| miR-21 | ENSDARG000000012306    | <i>syt13</i>             | <i>zgc:112063</i>                                             | synaptotagmin XIII                                                                                | 0.80             | -0.39                 |
| miR-21 | ENSDARG000000014828    | <i>l3mbtl1a</i>          | <i>l3mbtl1, si:ch211-262h21.1</i>                             | L3MBTL histone methyl-lysine binding protein 1a                                                   | 0.80             | -0.33                 |

|         |                     |                        |                                                                         |                                                           |      |       |
|---------|---------------------|------------------------|-------------------------------------------------------------------------|-----------------------------------------------------------|------|-------|
| miR-21  | ENSDARG00000017653  | <i>rgs13</i>           | <i>zgc:163081</i>                                                       | regulator of G protein signaling 13                       | 0.80 | -0.33 |
| miR-21  | ENSDARG00000045352  | <i>cst14a.2</i>        | <i>cst14a, zgc:56530</i>                                                | cystatin 14a, tandem duplicate 2                          | 0.79 | -0.34 |
| miR-21  | ENSDARG00000016207  | <i>zgc:112408</i>      | N/A                                                                     | <i>zgc:112408</i>                                         | 0.79 | -0.38 |
| miR-21  | ENSDARG000000062164 | <i>Atrn</i>            | <i>si:dkey-259n11.1</i>                                                 | attractin                                                 | 0.79 | -0.29 |
| miR-21  | ENSDARG00000043128  | <i>cldne</i>           | <i>cb84, fb16e12, wu:fb16e12</i>                                        | claudin e                                                 | 0.79 | -0.32 |
| miR-21  | ENSDARG00000039434  | <i>oprm1</i>           | ZFOR2, ZfMOR                                                            | opioid receptor, mu 1                                     | 0.78 | -0.29 |
| miR-21  | ENSDARG00000088505  | <i>fam217b</i>         | <i>si:dkey-211h10.3</i>                                                 | family with sequence similarity 217 member B              | 0.78 | -0.37 |
| miR-21  | ENSDARG00000040910  | <i>ildr1b</i>          | <i>fc95b03, ildr1, wu:fc95b03, zgc:101133</i>                           | immunoglobulin-like domain containing receptor 1b         | 0.78 | -0.37 |
| miR-21  | ENSDARG00000076302  | <i>DTX4a</i>           | <i>dtx1, si:ch211-119e14.2, dtx4</i>                                    | deltex 4, E3 ubiquitin ligase a                           | 0.78 | -0.32 |
| miR-21  | ENSDARG00000058365  | <i>hspb8</i>           | <i>fc09c11, wu:fc04b04, wu:fc09c11, zgc:64202</i>                       | heat shock protein b8                                     | 0.78 | -0.34 |
| miR-21  | ENSDARG00000026444  | <i>apob</i>            | <i>apoo, mgc4825b, si:rp71-lf1.3, wu:fr42a11, zgc:103766</i>            | apolipoprotein O, b                                       | 0.78 | -0.30 |
| miR-21  | ENSDARG00000011459  | <i>gsna</i>            | <i>cb107, gsn, sb:cb107, u-gelsolin, wu:fi16f06</i>                     | gelsolin a                                                | 0.78 | -0.24 |
| miR-21  | ENSDARG00000012381  | <i>hsc70</i>           | <i>zgc:63663</i>                                                        | heat shock cognate 70                                     | 0.78 | -0.38 |
| miR-21  | ENSDARG00000079751  | <i>megf8</i>           | <i>fb77g03, si:dkey-108f8.4, wu:fb77g03, zgc:158741</i>                 | multiple EGF-like-domains 8                               | 0.77 | -0.29 |
| miR-21  | ENSDARG00000032010  | <i>slc15a2</i>         | <i>PEPT2, wu:fc84g07, wu:fi22a10, zgc:152684</i>                        | solute carrier family 15 member 2                         | 0.77 | -0.34 |
| miR-21  | ENSDARG00000027992  | <i>hao2</i>            | <i>zgc:63690</i>                                                        | hydroxyacid oxidase 2 (long chain)                        | 0.77 | -0.33 |
| miR-21  | ENSDARG00000079104  | <i>mflas1</i>          | <i>im:7154887, si:dkey-250j7.4</i>                                      | malignant fibrous histiocytoma amplified sequence 1       | 0.77 | -0.33 |
| miR-21  | ENSDARG00000034808  | <i>kcnip1b</i>         | <i>zgc:101531</i>                                                       | Kv channel interacting protein 1 b                        | 0.76 | -0.33 |
| miR-21  | ENSDARG00000015863  | <i>socs6b</i>          | <i>socs6l, wu:fb77f06, zgc:64107</i>                                    | suppressor of cytokine signaling 6b                       | 0.75 | -0.25 |
| miR-21  | ENSDARG00000078676  | <i>myrf</i>            | <i>c11orf9, zgc:172183</i>                                              | myelin regulatory factor                                  | 0.75 | -0.21 |
| miR-21  | ENSDARG000000094894 | <i>tyrobp</i>          | <i>dap12</i>                                                            | transmembrane immune signaling adaptor TYROBP             | 0.75 | -0.37 |
| miR-21  | ENSDARG00000070826  | <i>bpgm</i>            | <i>zgc:92230</i>                                                        | 2,3-bisphosphoglycerate mutase                            | 0.75 | -0.31 |
| miR-21  | ENSDARG00000060092  | <i>zgc:165481</i>      | N/A                                                                     | <i>zgc:165481</i>                                         | 0.75 | -0.36 |
| miR-21  | ENSDARG00000056572  | <i>nrsn11</i>          | <i>si:dkey-261i16.5, NRSN2</i>                                          | neurensin 1-like                                          | 0.75 | -0.26 |
| miR-21  | ENSDARG00000095949  | <i>si:dkey-22i16.9</i> | N/A                                                                     | <i>si:dkey-22i16.9</i>                                    | 0.75 | -0.30 |
| miR-21  | ENSDARG00000044924  | <i>gdf11</i>           | <i>bmp11</i>                                                            | growth differentiation factor 11                          | 0.74 | -0.40 |
| miR-21  | ENSDARG00000088140  | <i>hsd17b7</i>         | <i>zgc:153977</i>                                                       | hydroxysteroid (17-beta) dehydrogenase 7                  | 0.74 | -0.33 |
| miR-21  | ENSDARG00000009273  | <i>ppm1da</i>          | <i>ppm1d, wu:fi44c08, zgc:55836, zgc:77316</i>                          | protein phosphatase, Mg2+/Mn2+ dependent, 1Da             | 0.73 | -0.37 |
| miR-21  | ENSDARG00000077442  | <i>tubgcp5</i>         | <i>fa03b04, fe01d03, wu:fa03b04, wu:fe01d03, zgc:110217</i>             | tubulin, gamma complex associated protein 5               | 0.73 | -0.31 |
| miR-21  | ENSDARG00000019335  | <i>hes6</i>            | <i>her13.2</i>                                                          | hes family bHLH transcription factor 6                    | 0.73 | -0.31 |
| miR-21  | ENSDARG00000046006  | <i>med20</i>           | <i>trfp, zgc:101043</i>                                                 | mediator complex subunit 20                               | 0.73 | -0.36 |
| miR-21  | ENSDARG00000056530  | <i>cpamd8</i>          | <i>si:ch211-87h14.4, si:dkey-94n12.1</i>                                | C3 and PZP like alpha-2-macroglobulin domain containing 8 | 0.73 | -0.40 |
| miR-21  | ENSDARG00000073962  | <i>ccdc32</i>          | <i>si:ch211-210h14.3</i>                                                | coiled-coil domain containing 32                          | 0.72 | -0.29 |
| miR-21  | ENSDARG00000024829  | <i>tnn</i>             | <i>etID309873.2, tenw, tmw, zgc:110729</i>                              | tenascin N                                                | 0.72 | -0.28 |
| miR-21  | ENSDARG00000052470  | <i>igfbp2a</i>         | <i>IGFBP-2, igfbp2, igfbp2b</i>                                         | insulin-like growth factor binding protein 2a             | 0.72 | -0.21 |
| miR-21  | ENSDARG00000074866  | <i>ptpn5</i>           | N/A                                                                     | protein tyrosine phosphatase non-receptor type 5          | 0.72 | -0.23 |
| miR-21  | ENSDARG00000041022  | <i>pdc4b</i>           | <i>cb45, pdc4, sb:cb45, wu:fc84b08</i>                                  | programmed cell death 4b                                  | 0.71 | -0.25 |
| miR-21  | ENSDARG00000016527  | <i>helz2</i>           | <i>gb:eb955855</i>                                                      | helicase with zinc finger 2, transcriptional coactivator  | 0.71 | -0.30 |
| miR-21  | ENSDARG00000053961  | <i>slc2a11a</i>        | <i>slc2a11, zglut11a, CR293534.1</i>                                    | solute carrier family 2 member 11a                        | 0.71 | -0.22 |
| miR-21  | ENSDARG00000019529  | <i>parp1</i>           | <i>si:dkey-206f10.3, wu:fc60f12, zgc:110092</i>                         | poly (ADP-ribose) polymerase 1                            | 0.71 | -0.36 |
| miR-21  | ENSDARG00000037837  | <i>ogfr</i>            | <i>fb25b04, fj34c06, ogfr2, si:dkeyp-44b8.5, wu:fb25b04, wu:fj34c06</i> | opioid growth factor receptor                             | 0.71 | -0.25 |
| miR-21  | ENSDARG00000087867  | <i>SLC2A13</i>         | N/A                                                                     | proton myo-inositol cotransporter-like                    | 0.70 | -0.22 |
| miR-21  | ENSDARG00000060021  | <i>vcpkmt</i>          | <i>im:7159042, mettl21d, zgc:153596</i>                                 | valosin containing protein lysine (K) methyltransferase   | 0.70 | -0.25 |
| miR-21  | ENSDARG00000031888  | <i>mapk8a</i>          | <i>jnk1a-2, zgc:172209</i>                                              | mitogen-activated protein kinase 8a                       | 0.70 | -0.41 |
| miR-21  | ENSDARG00000038011  | <i>cyth4a</i>          | <i>cyth4</i>                                                            | cytohesin 4a                                              | 0.70 | -0.26 |
| miR-21  | ENSDARG00000022659  | <i>snx4</i>            | <i>im:6971267, wu:fb92d09, zgc:113437</i>                               | sorting nexin 4                                           | 0.70 | -0.32 |
| miR-122 | ENSDARG00000024443  | <i>gnpda2</i>          | <i>si:dkey-185e18.2</i>                                                 | glucosamine-6-phosphate deaminase 2                       | 0.98 | -0.86 |
| miR-122 | ENSDARG00000021374  | <i>cab39l1</i>         | <i>cab39, wu:fb72b01, wu:fi37c08, zgc:55451</i>                         | calcium binding protein 39, like 1                        | 0.96 | -0.60 |
| miR-122 | ENSDARG00000062954  | <i>clk2a</i>           | <i>fb20c02, si:ch211-81a5.7, wu:fb20c02, clk2</i>                       | CDC-like kinase 2a                                        | 0.96 | -0.45 |
| miR-122 | ENSDARG00000031954  | <i>rbck1</i>           | <i>zgc:91964</i>                                                        | RanBP-type and C3HC4-type zinc finger containing 1        | 0.95 | -0.49 |
| miR-122 | ENSDARG00000014047  | <i>cldn7b</i>          | <i>cb388, cldn7, fd19f08, wu:fd19f08</i>                                | claudin 7b                                                | 0.95 | -0.43 |
| miR-122 | ENSDARG00000077364  | <i>mapk9</i>           | <i>jnk2, si:ch211-247j9.2</i>                                           | mitogen-activated protein kinase 9                        | 0.94 | -0.42 |

|         |                     |                          |                                                                                                         |                                                                               |      |       |
|---------|---------------------|--------------------------|---------------------------------------------------------------------------------------------------------|-------------------------------------------------------------------------------|------|-------|
| miR-122 | ENSDARG00000030095  | <i>ccdc78</i>            | N/A                                                                                                     | coiled-coil domain containing 78                                              | 0.93 | -1.18 |
| miR-122 | ENSDARG00000020326  | <i>tyk2</i>              | N/A                                                                                                     | tyrosine kinase 2                                                             | 0.93 | -0.26 |
| miR-122 | ENSDARG00000038981  | <i>zgc:153615</i>        | N/A                                                                                                     | <i>zgc:153615</i>                                                             | 0.93 | -0.38 |
| miR-122 | ENSDARG00000074041  | <i>abca5</i>             | <i>zgc:163009</i>                                                                                       | ATP-binding cassette, sub-family A (ABC1), member 5                           | 0.92 | -0.46 |
| miR-122 | ENSDARG00000009281  | <i>dnm1b</i>             | <i>si:ch73-310g9.3</i>                                                                                  | dynamins 1b                                                                   | 0.91 | -0.76 |
| miR-122 | ENSDARG00000078887  | <i>atp10d</i>            | <i>si:dkey-20i10.6</i>                                                                                  | ATPase phospholipid transporting 10D                                          | 0.91 | -0.59 |
| miR-122 | ENSDARG00000069507  | <i>mettl27</i>           | <i>Williams Beuren syndrome chromosome region 27, im:7139431, wbscr27, wu:fe50c11, zgc:136279</i>       | methyltransferase like 27                                                     | 0.91 | -0.61 |
| miR-122 | ENSDARG00000061231  | <i>tinagl1</i>           | <i>LCN7, lipocalin-7, si:dkey-158b13.1</i>                                                              | tubulointerstitial nephritis antigen-like 1                                   | 0.90 | -0.40 |
| miR-122 | ENSDARG00000044420  | <i>dnajc19</i>           | <i>zgc:73251</i>                                                                                        | DnaJ (Hsp40) homolog, subfamily C, member 19                                  | 0.90 | -1.00 |
| miR-122 | ENSDARG00000021681  | <i>asrgl1</i>            | <i>zgc:103568</i>                                                                                       | asparaginase and isoaspartyl peptidase 1                                      | 0.90 | -0.43 |
| miR-122 | ENSDARG00000060917  | <i>Anln</i>              | <i>si:ch211-197n10.2, wu:fb74d05, wu:fd10d09, wu:fi41f04</i>                                            | anillin, actin binding protein                                                | 0.89 | -0.41 |
| miR-122 | ENSDARG00000003776  | <i>pip4k2aa</i>          | <i>pip4k2a, zgc:194746, zgc:194777</i>                                                                  | phosphatidylinositol-5-phosphate 4-kinase, type II, alpha a                   | 0.89 | -0.47 |
| miR-122 | ENSDARG00000075530  | <i>Pigu</i>              | N/A                                                                                                     | phosphatidylinositol glycan anchor biosynthesis, class U                      | 0.89 | -0.42 |
| miR-122 | ENSDARG000000062081 | <i>tbc1d1</i>            | N/A                                                                                                     | TBC1 (tre-2/USP6, BUB2, cdc16) domain family, member 1                        | 0.89 | -0.72 |
| miR-122 | ENSDARG00000068264  | <i>grhpra</i>            | <i>grhpr, si:ch211-240l14.3, zgc:109900</i>                                                             | glyoxylate reductase/hydroxypyruvate reductase a                              | 0.89 | -0.44 |
| miR-122 | ENSDARG00000071082  | <i>p4ha1b</i>            | <i>p4ha1, wu:fc69d06, wu:fi27h11, zgc:56058</i>                                                         | prolyl 4-hydroxylase, alpha polypeptide I b                                   | 0.88 | -0.79 |
| miR-122 | ENSDARG00000091320  | <i>nlrc6</i>             | <i>NACHT, LRR and PYD domains-containing protein 12e, Nacht 1.01, nlrp12e, zgc:136791, zgc:136791</i>   | NLR family CARD domain containing 6                                           | 0.88 | -0.40 |
| miR-122 | ENSDARG00000017542  | <i>fgf1a</i>             | <i>fgf1, zgc:73249</i>                                                                                  | fibroblast growth factor 1a                                                   | 0.88 | -0.25 |
| miR-122 | ENSDARG00000061207  | <i>ttc7b</i>             | <i>wu:fi46e11, zgc:153460</i>                                                                           | tetratricopeptide repeat domain 7B                                            | 0.87 | -0.34 |
| miR-122 | ENSDARG00000000442  | <i>slc39a13</i>          | <i>ZIP13, si:by184l24.1, si:xx-184l24.1, wu:fa55a07, zgc:136440</i>                                     | solute carrier family 39 member 13                                            | 0.87 | -0.73 |
| miR-122 | ENSDARG00000003520  | <i>tbc1d14</i>           | <i>sb:eu1004, si:dkey-120m5.1, wu:fi35h01, wu:fi42a03</i>                                               | TBC1 domain family, member 14                                                 | 0.87 | -0.43 |
| miR-122 | ENSDARG00000045465  | <i>lancl2</i>            | <i>zgc:158293</i>                                                                                       | LanC lantibiotic synthetase component C-like 2                                | 0.86 | -0.30 |
| miR-122 | ENSDARG00000056144  | <i>zgc:123244</i>        | <i>TMEM150B</i>                                                                                         | <i>zgc:123244; orthologous to human TMEM150B (transmembrane protein 150B)</i> | 0.86 | -0.47 |
| miR-122 | ENSDARG00000061436  | <i>col6a2</i>            | N/A                                                                                                     | collagen, type VI, alpha 2                                                    | 0.86 | -0.40 |
| miR-122 | ENSDARG00000069264  | <i>si:ch211-196h16.5</i> | <i>Gene1133</i>                                                                                         | <i>si:ch211-196h16.5</i>                                                      | 0.86 | -0.40 |
| miR-122 | ENSDARG00000034409  | <i>pik3r3b</i>           | <i>pik3r3, zgc:55564, zgc:85710</i>                                                                     | phosphoinositide-3-kinase, regulatory subunit 3b (gamma)                      | 0.85 | -0.38 |
| miR-122 | ENSDARG00000038237  | <i>tbc1d12a</i>          | <i>wu:fc59a02, tbc1d12</i>                                                                              | TBC1 domain family, member 12a                                                | 0.85 | -0.52 |
| miR-122 | ENSDARG00000089444  | <i>omgb</i>              | <i>ogmb, omg</i>                                                                                        | oligodendrocyte myelin glycoprotein b                                         | 0.85 | -0.44 |
| miR-122 | ENSDARG00000014181  | <i>foxp1b</i>            | <i>foxp1, im:7139058, wu:fc83a06</i>                                                                    | forkhead box P1b                                                              | 0.84 | -0.30 |
| miR-122 | ENSDARG00000037837  | <i>ogfr</i>              | <i>fb25b04, fj34c06, ogfr2, si:dkeyp-44b8.5, wu:fb25b04, wu:fj34c06</i>                                 | opioid growth factor receptor                                                 | 0.84 | -0.82 |
| miR-122 | ENSDARG00000056985  | <i>Tpte</i>              | <i>Dr-VSP, tpip, wu:fd20e11, wu:fi24b06</i>                                                             | transmembrane phosphatase with tensin homology                                | 0.84 | -0.40 |
| miR-122 | ENSDARG00000014674  | <i>acsl3b</i>            | <i>acsl3, fa07a08, im:7155129, si:dkey-20f20.5, wu:fa07a08, wu:fb34c03</i>                              | acyl-CoA synthetase long chain family member 3b                               | 0.84 | -0.73 |
| miR-122 | ENSDARG00000043934  | <i>il17a/f2</i>          | N/A                                                                                                     | interleukin 17a/f2                                                            | 0.83 | -0.40 |
| miR-122 | ENSDARG00000078026  | <i>zcchc24</i>           | <i>fc45d05, wu:fc45d05, zgc:158323</i>                                                                  | zinc finger, CCHC domain containing 24                                        | 0.83 | -0.33 |
| miR-122 | ENSDARG00000076889  | <i>ralgapa1</i>          | <i>garnl1, ulip1</i>                                                                                    | Ral GTPase activating protein, alpha subunit 1 (catalytic)                    | 0.83 | -0.37 |
| miR-122 | ENSDARG00000052856  | <i>khdrbs1a</i>          | <i>fa18g12, fa56c01, fc91b01, fj90g10, khdrbs1, p62, wu:fa18g12, wu:fa56c01, wu:fc91b01, wu:fj90g10</i> | KH domain containing, RNA binding, signal transduction associated 1a          | 0.82 | -0.25 |
| miR-122 | ENSDARG00000071017  | <i>nt5e</i>              | <i>zgc:63784</i>                                                                                        | 5'-nucleotidase, ecto (CD73)                                                  | 0.82 | -0.41 |
| miR-122 | ENSDARG00000055945  | <i>asph</i>              | <i>cb971, fb69e10, fc06d04, fc95a08, junctin, wu:fb69e10, wu:fc06d04, wu:fc95a08</i>                    | aspartate beta-hydroxylase                                                    | 0.82 | -0.43 |
| miR-122 | ENSDARG00000073959  | <i>pmch</i>              | <i>pmch2, si:ch211-260p3.3</i>                                                                          | pro-melanin-concentrating hormone                                             | 0.82 | -0.40 |
| miR-122 | ENSDARG00000022668  | <i>grapb</i>             | <i>si:dkeyp-9d4.1, zgc:109892</i>                                                                       | GRB2 related adaptor protein b                                                | 0.82 | -0.26 |
| miR-122 | ENSDARG00000034643  | <i>fhl3a</i>             | <i>fd57e01, fhl3, wu:fd57e01, fhl3</i>                                                                  | four and a half LIM domains 3a                                                | 0.81 | -0.40 |
| miR-122 | ENSDARG00000061400  | <i>csgalnact2</i>        | <i>mp:zf637-2-001473, si:dkey-192p21.4, wu:fb98d03, zf637-2-001473</i>                                  | chondroitin sulfate N-acetylglactosaminyltransferase 2                        | 0.80 | -0.39 |
| miR-122 | ENSDARG00000055502  | <i>cicb</i>              | <i>cic, wu:fb93c01</i>                                                                                  | capicua transcriptional repressor b                                           | 0.79 | -0.32 |
| miR-122 | ENSDARG00000070132  | <i>astela</i>            | <i>astel, si:dkey-11p23.5</i>                                                                           | asteroid homolog 1a                                                           | 0.79 | -0.48 |
| miR-122 | ENSDARG00000034240  | <i>capza1a</i>           | <i>capza1, wu:fa19e05, wu:fk22d04, zgc:56314, zgc:85654</i>                                             | capping actin protein of muscle Z-line subunit alpha 1a                       | 0.79 | -0.38 |

|         |                     |                          |                                                                                       |                                                                                                   |      |       |
|---------|---------------------|--------------------------|---------------------------------------------------------------------------------------|---------------------------------------------------------------------------------------------------|------|-------|
| miR-122 | ENSDARG00000055118  | <i>mylipb</i>            | <i>zgc:153767</i>                                                                     | myosin regulatory light chain interacting protein b                                               | 0.79 | -0.42 |
| miR-122 | ENSDARG00000051814  | <i>ptprz1a</i>           | <i>ca16c, im:7144789, ptpz1, zCA16c</i>                                               | protein tyrosine phosphatase receptor type Z1a                                                    | 0.78 | -0.40 |
| miR-122 | ENSDARG00000056762  | <i>tm4sf21b</i>          | <i>zgc:172079</i>                                                                     | transmembrane 4 L six family member 21b                                                           | 0.78 | -0.45 |
| miR-122 | ENSDARG00000017244  | <i>chd6</i>              | <i>si:dkey-6e2.3, zmp:0000000556</i>                                                  | chromodomain helicase DNA binding protein 6                                                       | 0.78 | -0.25 |
| miR-122 | ENSDARG00000056184  | <i>dvl2</i>              | <i>sb:eu471, wu:fc05d12, wu:fo71e09, wu:fp54a02, zgc:55372</i>                        | dishevelled segment polarity protein 2                                                            | 0.78 | -0.26 |
| miR-122 | ENSDARG00000078502  | <i>si:ch211-150o23.3</i> | <i>SSC5D</i>                                                                          | <i>si:ch211-150o23.3</i>                                                                          | 0.78 | -0.28 |
| miR-122 | ENSDARG00000087759  | <i>cnih4</i>             | <i>fb51e06, fc10d11, wu:fb51e06, wu:fc10d11, wu:fi84d07</i>                           | cornichon family AMPA receptor auxiliary protein 4                                                | 0.77 | -0.40 |
| miR-122 | ENSDARG00000069476  | <i>spint2</i>            | <i>fb52h04, fe24a06, wu:fb52h04, wu:fe24a06, zgc:153795</i>                           | serine peptidase inhibitor, Kunitz type, 2                                                        | 0.77 | -0.43 |
| miR-122 | ENSDARG00000044295  | <i>pip5k1ba</i>          | <i>pip5k1b, zgc:101046</i>                                                            | phosphatidylinositol-4-phosphate 5-kinase, type I, beta a                                         | 0.77 | -0.38 |
| miR-122 | ENSDARG00000015314  | <i>zc4h2</i>             | <i>un-named hi2729b, unim hi2729b, wu:fb99f08, zgc:63849</i>                          | zinc finger, C4H2 domain containing                                                               | 0.77 | -0.43 |
| miR-122 | ENSDARG00000006074  | <i>uck2a</i>             | <i>umpk, wu:fk91a01</i>                                                               | uridine-cytidine kinase 2a                                                                        | 0.77 | -0.42 |
| miR-122 | ENSDARG00000062986  | <i>pnpla7a</i>           | <i>clica, zgc:158748</i>                                                              | patatin-like phospholipase domain containing 7a                                                   | 0.77 | -0.55 |
| miR-122 | ENSDARG00000056239  | <i>tmem45b</i>           | <i>zgc:77892</i>                                                                      | transmembrane protein 45B                                                                         | 0.76 | -0.37 |
| miR-122 | ENSDARG00000043843  | <i>akap7</i>             | <i>si:ch211-272f15.3</i>                                                              | A kinase (PRKA) anchor protein 7                                                                  | 0.76 | -0.33 |
| miR-122 | ENSDARG00000033184  | <i>prkar2aa</i>          | <i>wu:fb55f12, wu:ff29e12, wu:ff33e06, zgc:153742</i>                                 | protein kinase, cAMP-dependent, regulatory, type II, alpha A                                      | 0.76 | -0.27 |
| miR-122 | ENSDARG00000016260  | <i>fxr2</i>              | <i>id:ibd5046, zgc:56215, zgc:77472</i>                                               | fragile X mental retardation, autosomal homolog 2                                                 | 0.76 | -0.55 |
| miR-122 | ENSDARG00000095580  | <i>si:ch211-67e16.11</i> | <i>wu:fk68g02</i>                                                                     | <i>si:ch211-67e16.11</i>                                                                          | 0.75 | -0.46 |
| miR-122 | ENSDARG00000052624  | <i>spryd7a</i>           | <i>fd05e05, si:busm1-79f24.1, si:dkey-7a20.6, si:dz79f24.1, wu:fd05e05, zgc:56247</i> | SPRY domain containing 7a                                                                         | 0.75 | -0.31 |
| miR-122 | ENSDARG00000074535  | <i>lingo2a</i>           | <i>sc:d0348, lingo2</i>                                                               | leucine rich repeat and lg domain containing 2a                                                   | 0.75 | -0.36 |
| miR-122 | ENSDARG00000040565  | <i>ckmb</i>              | <i>ckm3, wu:fb55e09, zgc:64204</i>                                                    | creatine kinase, muscle b                                                                         | 0.75 | -0.37 |
| miR-122 | ENSDARG00000086645  | <i>hs3st3b1b</i>         | <i>3-ost-3z, z3-ost-3z</i>                                                            | heparan sulfate (glucosamine) 3-O-sulfotransferase 3B1b                                           | 0.75 | -0.33 |
| miR-122 | ENSDARG00000038822  | <i>mrc1b</i>             | <i>mrc1, si:ch211-106h4.2</i>                                                         | mannose receptor, C type 1b                                                                       | 0.75 | -0.28 |
| miR-122 | ENSDARG00000069324  | <i>vps53</i>             | <i>wu:fb77d11, zgc:103741</i>                                                         | VPS53 subunit of GARP complex                                                                     | 0.75 | -0.43 |
| miR-122 | ENSDARG00000079723  | <i>si:dkey-46g23.1</i>   | <i>TNRC6B</i>                                                                         | <i>si:dkey-46g23.1</i> ; orthologous to human TNRC6B (trinucleotide repeat containing adaptor 6B) | 0.75 | -0.27 |
| miR-122 | ENSDARG00000077946  | <i>smarcc2</i>           | <i>baf170</i>                                                                         | SWI/SNF related, matrix associated, actin dependent regulator of chromatin, subfamily c, member 2 | 0.75 | -0.32 |
| miR-122 | ENSDARG00000042970  | <i>gng8</i>              | <i>zgc:110316</i>                                                                     | guanine nucleotide binding protein (G protein), gamma 8                                           | 0.74 | -0.36 |
| miR-122 | ENSDARG00000016263  | <i>zdhhc5a</i>           | <i>si:dkey-28b4.5</i>                                                                 | zinc finger DHHC-type containing 5a                                                               | 0.74 | -0.30 |
| miR-122 | ENSDARG00000025309  | <i>dpf3</i>              | <i>fi43h12, si:ch211-268e23.1, wu:fi43h12</i>                                         | D4, zinc and double PHD fingers, family 3                                                         | 0.73 | -0.43 |
| miR-122 | ENSDARG00000054848  | <i>pdk4</i>              | <i>si:rp71-57j15.4</i>                                                                | pyruvate dehydrogenase kinase, isozyme 4                                                          | 0.73 | -0.30 |
| miR-122 | ENSDARG00000056481  | <i>vat1</i>              | <i>si:dz163124.2</i>                                                                  | vesicle amine transport 1                                                                         | 0.73 | -0.50 |
| miR-122 | ENSDARG00000056108  | <i>ndufa4</i>            | <i>zgc:73405</i>                                                                      | NADH:ubiquinone oxidoreductase subunit A4                                                         | 0.73 | -0.42 |
| miR-122 | ENSDARG000000061473 | <i>tbkbp1</i>            | <i>zmp:0000000698</i>                                                                 | TBK1 binding protein 1                                                                            | 0.72 | -0.38 |
| miR-122 | ENSDARG00000077506  | <i>tjp1a</i>             | <i>cb817, tjp1, tjp1.1, zo-1</i>                                                      | tight junction protein 1a                                                                         | 0.72 | -0.21 |
| miR-122 | ENSDARG00000070579  | <i>ggact.3</i>           | <i>zgc:162208, A2LD1</i>                                                              | gamma-glutamylamine cyclotransferase, tandem duplicate 3                                          | 0.72 | -0.44 |
| miR-122 | ENSDARG00000001733  | <i>gulf1a</i>            | <i>gulf1, si:by35d8.1, si:ch211-198b21.4, si:xx-35d8.1, wuj61e02</i>                  | GULP PTB domain containing engulfment adaptor 1a                                                  | 0.71 | -0.25 |
| miR-122 | ENSDARG00000058114  | <i>impad1</i>            | <i>zgc:123256</i>                                                                     | inositol monophosphatase domain containing 1                                                      | 0.71 | -0.29 |
| miR-122 | ENSDARG0000004939   | <i>midhb</i>             | N/A                                                                                   | metadherin b                                                                                      | 0.71 | -0.63 |
| miR-122 | ENSDARG00000036028  | <i>arrdc3b</i>           | <i>zgc:92034</i>                                                                      | arrestin domain containing 3b                                                                     | 0.71 | -0.41 |
| miR-122 | ENSDARG00000006151  | <i>pde11a1</i>           | <i>pde11a, wu:fi39g12</i>                                                             | phosphodiesterase 11a, like                                                                       | 0.71 | -0.21 |
| miR-122 | ENSDARG00000045360  | <i>flj110111</i>         | <i>zgc:136503</i>                                                                     | hypothetical protein FLJ11011-like (H. sapiens)                                                   | 0.70 | -0.28 |
| miR-122 | ENSDARG00000019644  | <i>ldhba</i>             | <i>ldhb, wu:fa16d07, wu:fa20c10, wu:fa96a08</i>                                       | lactate dehydrogenase Ba                                                                          | 0.70 | -0.27 |
| miR-122 | ENSDARG00000036107  | <i>txnipa</i>            | <i>sb:cb368, txnip</i>                                                                | thioredoxin interacting protein a                                                                 | 0.70 | -0.34 |
| miR-122 | ENSDARG00000020890  | <i>tmod4</i>             | <i>Sk-Tmod, fa12b03, skeletal tropomodulin, sktmod, wu:fa12b03</i>                    | tropomodulin 4 (muscle)                                                                           | 0.70 | -0.42 |
| miR-122 | ENSDARG00000037773  | <i>rybpa</i>             | <i>cb337, rybp, wu:fi34f03</i>                                                        | RING1 and YY1 binding protein a                                                                   | 0.70 | -0.34 |
| miR-731 | ENSDARG00000019516  | <i>sp7</i>               | <i>osterix, osx</i>                                                                   | Sp7 transcription factor                                                                          | 0.99 | -0.50 |
| miR-731 | ENSDARG00000004735  | <i>hnrnpub</i>           | <i>hnrnpu, hnrpu, wu:fa66f11, wu:fc18b08, wu:fi89c08, zgc:111835, zgc:136480</i>      | heterogeneous nuclear ribonucleoprotein Ub                                                        | 0.98 | -0.32 |
| miR-731 | ENSDARG00000010186  | <i>myo3a</i>             | N/A                                                                                   | myosin IIIA                                                                                       | 0.97 | -0.48 |

|         |                      |                       |                                                                                 |                                                                                             |      |       |
|---------|----------------------|-----------------------|---------------------------------------------------------------------------------|---------------------------------------------------------------------------------------------|------|-------|
| miR-731 | ENSDARG00000009031   | <i>tnikb</i>          | <i>im:6898857, zgc:123033, zgc:152783</i>                                       | TRAF2 and NCK interacting kinase b                                                          | 0.97 | -0.52 |
| miR-731 | ENSDARG00000027750   | <i>dpp7</i>           | <i>wu:fb19g02, zgc:112274, zgc:113564</i>                                       | dipeptidyl-peptidase 7                                                                      | 0.96 | -0.31 |
| miR-731 | ENSDARG00000002840   | <i>si:dkey-28b4.8</i> | N/A                                                                             | <i>si:dkey-28b4.8</i>                                                                       | 0.96 | -0.26 |
| miR-731 | ENSDARG000000018923  | <i>fat2</i>           | <i>fk09f07, wu:fk09f07</i>                                                      | FAT atypical cadherin 2                                                                     | 0.96 | -0.30 |
| miR-731 | ENSDARG000000032565  | <i>cacng2a</i>        | <i>zgc:64200</i>                                                                | calcium channel, voltage-dependent, gamma subunit 2a                                        | 0.94 | -0.30 |
| miR-731 | ENSDARG000000090764  | <i>bcas3</i>          | <i>zgc:63764</i>                                                                | BCAS3 microtubule associated cell migration factor                                          | 0.94 | -0.61 |
| miR-731 | ENSDARG000000016854  | <i>neurod2</i>        | <i>NDF2, fj49a11, ndr2, wu:fj49a11, zNdr2</i>                                   | neuronal differentiation 2                                                                  | 0.94 | -0.30 |
| miR-731 | ENSDARG000000063572  | <i>Perp</i>           | <i>fk24g11, wu:fk24g11</i>                                                      | p53 apoptosis effector related to pmp22                                                     | 0.93 | -0.33 |
| miR-731 | ENSDARG000000062055  | <i>rnf38</i>          | <i>fa94e11, si:dkey-20n3.1, wu:fa94e11</i>                                      | ring finger protein 38                                                                      | 0.92 | -0.24 |
| miR-731 | ENSDARG000000044980  | <i>kpna6</i>          | <i>zmp:0000000623</i>                                                           | karyopherin alpha 6 (importin alpha 7)                                                      | 0.91 | -0.40 |
| miR-731 | ENSDARG000000043584  | <i>ifit15</i>         | <i>lfit17b, ifit2, wu:fb58d07</i>                                               | interferon-induced protein with tetratricopeptide repeats 15                                | 0.90 | -0.21 |
| miR-731 | ENSDARG000000070337  | <i>hoxc1a</i>         | <i>z-42</i>                                                                     | homeobox C1a                                                                                | 0.90 | -0.29 |
| miR-731 | ENSDARG000000019752  | <i>rom1a</i>          | <i>zgc:73336, zgc:77401</i>                                                     | retinal outer segment membrane protein 1a                                                   | 0.90 | -0.38 |
| miR-731 | ENSDARG000000024092  | <i>lmbr1</i>          | <i>im:7156444</i>                                                               | limb development membrane protein 1                                                         | 0.90 | -0.37 |
| miR-731 | ENSDARG000000057586  | <i>sall3b</i>         | <i>im:7138196, sall3l, sallb, si:dkey-195c14.1, wu:fb01e09, sall3</i>           | spalt-like transcription factor 3b                                                          | 0.90 | -0.36 |
| miR-731 | ENSDARG000000042526  | <i>sebox</i>          | <i>OG9 homeobox gene, mezzo, og9x</i>                                           | SEBOX homeobox                                                                              | 0.89 | -0.38 |
| miR-731 | ENSDARG000000059707  | <i>znf423</i>         | <i>zgc:158272, si:ch211-216123.1</i>                                            | zinc finger protein 423                                                                     | 0.88 | -0.23 |
| miR-731 | ENSDARG000000033957  | <i>trmt44</i>         | <i>mettl19, zgc:101657</i>                                                      | tRNA methyltransferase 44 homolog                                                           | 0.88 | -0.26 |
| miR-731 | ENSDARG0000000068369 | <i>angptl2b</i>       | <i>angptl2, wu:fc41g02</i>                                                      | angiopoietin-like 2b                                                                        | 0.88 | -0.43 |
| miR-731 | ENSDARG000000029252  | <i>Ssb</i>            | <i>wu:fb17f11</i>                                                               | small RNA binding exonuclease protection factor La                                          | 0.88 | -0.24 |
| miR-731 | ENSDARG000000043283  | <i>prrg1</i>          | <i>zgc:103657</i>                                                               | proline rich Gla (G-carboxyglutamic acid) 1                                                 | 0.87 | -0.39 |
| miR-731 | ENSDARG000000023999  | <i>heatr5a</i>        | <i>si:busm1-142b24.3, si:dz142b24.3, zgc:63665</i>                              | HEAT repeat containing 5a                                                                   | 0.87 | -0.43 |
| miR-731 | ENSDARG000000043003  | <i>pcyt2</i>          | <i>im:7158585, wu:fb39h11, zgc:103434</i>                                       | phosphate cytidyltransferase 2, ethanolamine                                                | 0.87 | -0.53 |
| miR-731 | ENSDARG000000069922  | <i>pla1a</i>          | <i>wu:fj26h09, zgc:77160, popdc2</i>                                            | popeye domain containing 2                                                                  | 0.87 | -0.28 |
| miR-731 | ENSDARG0000000019326 | <i>prpsap2</i>        | <i>wu:fj14g04, zgc:55477, zgc:85610</i>                                         | phosphoribosyl pyrophosphate synthetase-associated protein 2                                | 0.86 | -0.33 |
| miR-731 | ENSDARG000000010248  | <i>wdr54</i>          | <i>zgc:100930</i>                                                               | WD repeat domain 54                                                                         | 0.86 | -0.23 |
| miR-731 | ENSDARG000000016141  | <i>slc6a2</i>         | <i>si:dkey-182h7.3</i>                                                          | solute carrier family 6 member 2                                                            | 0.86 | -0.49 |
| miR-731 | ENSDARG000000062837  | <i>spata13</i>        | <i>si:dkey-33c18.3</i>                                                          | spermatogenesis associated 13                                                               | 0.86 | -0.24 |
| miR-731 | ENSDARG000000074635  | <i>abca1a</i>         | <i>abca1, cb939, fa03d03, im:6795541, wu:fa03d03, wu:fj13h01</i>                | ATP-binding cassette, sub-family A (ABC1), member 1A                                        | 0.86 | -0.27 |
| miR-731 | ENSDARG000000057869  | <i>cdc42l2</i>        | <i>cdc42b, zgc:136923</i>                                                       | cell division cycle 42 like 2                                                               | 0.85 | -0.70 |
| miR-731 | ENSDARG000000070792  | <i>lrrc15</i>         | <i>cb894, zgc:158286</i>                                                        | leucine rich repeat containing 15                                                           | 0.85 | -0.45 |
| miR-731 | ENSDARG000000054683  | <i>prdm8b</i>         | <i>si:ch211-57h10.4</i>                                                         | PR domain containing 8b                                                                     | 0.85 | -0.41 |
| miR-731 | ENSDARG000000030608  | <i>rhogd</i>          | <i>rhoga, zgc:66008</i>                                                         | ras homolog gene family, member Gd                                                          | 0.85 | -0.26 |
| miR-731 | ENSDARG000000015495  | <i>klf3</i>           | <i>klf12</i>                                                                    | Kruppel-like factor 3 (basic)                                                               | 0.85 | -0.26 |
| miR-731 | ENSDARG000000023323  | <i>ywhaqb</i>         | <i>wu:fa91b01, wu:fb02e12, wu:fb36f06, wu:fk86h02, ywhaq1, ywhaz, zgc:55499</i> | tyrosine 3-monooxygenase/tryptophan 5-monooxygenase activation protein, theta polypeptide b | 0.85 | -0.46 |
| miR-731 | ENSDARG000000028173  | <i>slc4a2a</i>        | <i>ae2, ae2.1, slc4a2</i>                                                       | solute carrier family 4 member 2a                                                           | 0.84 | -0.27 |
| miR-731 | ENSDARG000000051916  | <i>cdk7</i>           | <i>zgc:85821</i>                                                                | cyclin-dependent kinase 7                                                                   | 0.84 | -0.28 |
| miR-731 | ENSDARG000000044492  | <i>ublcpl</i>         | <i>fb33g09, wu:fb33g09, zgc:86634</i>                                           | ubiquitin-like domain containing CTD phosphatase 1                                          | 0.84 | -0.24 |
| miR-731 | ENSDARG000000035837  | <i>mosmob</i>         | <i>zgc:153595, C12H16orf52</i>                                                  | modulator of smoothened b                                                                   | 0.84 | -0.47 |
| miR-731 | ENSDARG000000035660  | <i>kiaa0319l</i>      | <i>si:ch211-193k19.1</i>                                                        | KIAA0319 like; orthologous to human <i>KIAA0319L</i>                                        | 0.83 | -0.29 |
| miR-731 | ENSDARG000000040253  | <i>onecutl</i>        | <i>id:ibd5005, ocl, onecut, onecut l, onecut1</i>                               | one cut domain, family member, like                                                         | 0.83 | -0.62 |
| miR-731 | ENSDARG000000035634  | <i>rfc5</i>           | <i>zgc:110313</i>                                                               | replication factor C (activator 1) 5                                                        | 0.83 | -0.32 |
| miR-731 | ENSDARG000000086173  | <i>relb</i>           | <i>fj85b02, wu:fj85b02</i>                                                      | bv-rel avian reticuloendotheliosis viral oncogene homolog B                                 | 0.83 | -0.29 |
| miR-731 | ENSDARG0000000004160 | <i>reep3b</i>         | <i>im:6909180, reep3, sb:eu299, zgc:55529</i>                                   | receptor accessory protein 3b                                                               | 0.83 | -0.24 |
| miR-731 | ENSDARG000000056292  | <i>vsx1</i>           | <i>etlD309864.17</i>                                                            | visual system homeobox 1 homolog, chx10-like                                                | 0.83 | -0.53 |
| miR-731 | ENSDARG000000077721  | <i>knop1</i>          | <i>si:ch211-202h22.6, C1H16orf88</i>                                            | lysine-rich nucleolar protein 1                                                             | 0.83 | -0.23 |
| miR-731 | ENSDARG000000043019  | <i>exoc1</i>          | <i>sec31l, wu:fb58e03, zgc:64145</i>                                            | exocyst complex component 1                                                                 | 0.82 | -0.24 |
| miR-731 | ENSDARG000000056347  | <i>rab3aa</i>         | <i>rab3a, zgc:92276</i>                                                         | RAB3A, member RAS oncogene family, a                                                        | 0.82 | -0.27 |
| miR-731 | ENSDARG000000016743  | <i>angel2</i>         | <i>f178e02, si:ch211-181h6.2, wu:f178e02, zgc:153829</i>                        | angel homolog 2 (Drosophila)                                                                | 0.82 | -0.27 |
| miR-731 | ENSDARG000000032496  | <i>pon1</i>           | <i>zgc:91887</i>                                                                | paraoxonase 1                                                                               | 0.82 | -0.25 |
| miR-731 | ENSDARG000000008788  | <i>camk1gb</i>        | <i>fk61c03, wu:fk61c03, zgc:73155</i>                                           | calcium/calmodulin-dependent protein kinase Igb                                             | 0.82 | -0.29 |

|         |                      |                           |                                                                                     |                                                                                                              |      |       |
|---------|----------------------|---------------------------|-------------------------------------------------------------------------------------|--------------------------------------------------------------------------------------------------------------|------|-------|
| miR-731 | ENSDARG00000010454   | <i>gucal1a</i>            | <i>gcapl</i>                                                                        | guanylate cyclase activator 1A                                                                               | 0.81 | -0.35 |
| miR-731 | ENSDARG000000001676  | <i>gpm6bb</i>             | <i>DMgamma2, gpb6bb, zgc:110793</i>                                                 | glycoprotein M6Bb                                                                                            | 0.81 | -0.41 |
| miR-731 | ENSDARG000000059575  | <i>uhmk1</i>              | <i>zgc:153241</i>                                                                   | U2AF homology motif (UHM) kinase 1                                                                           | 0.81 | -0.28 |
| miR-731 | ENSDARG000000079740  | <i>efna2b</i>             | <i>si:dkey-174e10.1, EFNA2</i>                                                      | ephriin-A2b                                                                                                  | 0.81 | -0.25 |
| miR-731 | ENSDARG000000013730  | <i>slc4a4a</i>            | <i>NBC1, NBCE1, id:ibd2520, si:dkey-256m11.1, slc4a4</i>                            | solute carrier family 4 member 4a                                                                            | 0.81 | -0.59 |
| miR-731 | ENSDARG000000010791  | <i>dla</i>                | <i>cb335, delta A, fa04c10, wu:fa04c10</i>                                          | deltaA                                                                                                       | 0.80 | -0.26 |
| miR-731 | ENSDARG000000022372  | <i>kng1</i>               | <i>fb64g01, wu:fb64g01, zgc:103569</i>                                              | kininogen 1                                                                                                  | 0.80 | -0.27 |
| miR-731 | ENSDARG000000079345  | <i>si:ch211-217k17.10</i> | <i>fk24c04, wu:fk24c04</i>                                                          | <i>si:ch211-217k17.10</i>                                                                                    | 0.80 | -0.57 |
| miR-731 | ENSDARG000000030871  | <i>siah1</i>              | <i>id:ibd2635, zgc:56026</i>                                                        | siah E3 ubiquitin protein ligase 1                                                                           | 0.80 | -0.37 |
| miR-731 | ENSDARG000000043334  | <i>ccdc6a</i>             | <i>ccdc6, fj36e04, wu:fj36e04, zgc:77435</i>                                        | coiled-coil domain containing 6a                                                                             | 0.80 | -0.59 |
| miR-731 | ENSDARG000000056150  | <i>rbms2b</i>             | <i>zgc:100836</i>                                                                   | RNA binding motif, single stranded interacting protein 2b                                                    | 0.80 | -0.22 |
| miR-731 | ENSDARG000000020607  | <i>emc3</i>               | <i>loc55831, pob, wu:fi32f05, wu:fj63h08, zgc:63727</i>                             | ER membrane protein complex subunit 3                                                                        | 0.79 | -0.76 |
| miR-731 | ENSDARG000000070955  | <i>hmx3a</i>              | <i>Nkx5-1, hmx3, nkx5.1, zgc:109845</i>                                             | H6 family homeobox 3a                                                                                        | 0.79 | -0.22 |
| miR-731 | ENSDARG000000035577  | <i>cds2</i>               | <i>zgc:66134</i>                                                                    | CDP-diacylglycerol synthase (phosphatidate cytidyltransferase) 2                                             | 0.79 | -0.27 |
| miR-731 | ENSDARG000000076710  | <i>si:dkey-42123.7</i>    | <i>zmp:0000000806, CR848836.6</i>                                                   | <i>si:dkey-42123.7</i> ; orthologous to human <i>GPR33</i> (G protein-coupled receptor 33)                   | 0.79 | -0.21 |
| miR-731 | ENSDARG000000009273  | <i>ppm1da</i>             | <i>ppm1d, wu:fj44c08, zgc:55836, zgc:77316</i>                                      | protein phosphatase, Mg2+/Mn2+ dependent, 1Da                                                                | 0.78 | -0.50 |
| miR-731 | ENSDARG000000043608  | <i>elf4ebp1</i>           | <i>fc04h09, wu:fc04h09, zgc:64137</i>                                               | eukaryotic translation initiation factor 4E binding protein 1                                                | 0.78 | -0.23 |
| miR-731 | ENSDARG0000000091433 | <i>abhd17aa</i>           | <i>abhd17ca, fb50g01, wu:fb50g01, zgc:162293, FAM108A1</i>                          | abhydrolase domain containing 17Aa                                                                           | 0.78 | -0.24 |
| miR-731 | ENSDARG000000044267  | <i>sumo1</i>              | <i>fd12c02, hm:zeh0670, wu:fb74c02, wu:fd12c02, zgc:65934, zgc:85634</i>            | small ubiquitin like modifier 1                                                                              | 0.78 | -0.52 |
| miR-731 | ENSDARG000000094377  | <i>samd10b</i>            | <i>samd10, si:ch211-278f9.1, samd10</i>                                             | sterile alpha motif domain containing 10b                                                                    | 0.78 | -0.24 |
| miR-731 | ENSDARG000000042961  | <i>zgc:100920</i>         | N/A                                                                                 | <i>zgc:100920</i> ; orthologous to human <i>NKAIN4</i> (sodium/potassium transporting ATPase interacting 4). | 0.78 | -0.40 |
| miR-731 | ENSDARG0000000053110 | <i>pkib</i>               | <i>im:7054531, si:dkey-150h13.1</i>                                                 | protein kinase (cAMP-dependent, catalytic) inhibitor beta                                                    | 0.78 | -0.27 |
| miR-731 | ENSDARG000000017740  | <i>sec63</i>              | <i>zgc:92718</i>                                                                    | SEC63 homolog, protein translocation regulator                                                               | 0.78 | -0.39 |
| miR-731 | ENSDARG000000078095  | <i>cipcb</i>              | <i>si:ch73-387e10.3</i>                                                             | CLOCK-interacting pacemaker b                                                                                | 0.78 | -0.22 |
| miR-731 | ENSDARG000000011611  | <i>actr1</i>              | <i>hm:zehn1110, wu:fc22g09, wu:fc56d01, wu:fj52e08, zehnl110, zgc:56317</i>         | actin related protein 1, centractin                                                                          | 0.78 | -0.21 |
| miR-731 | ENSDARG0000000053665 | <i>gabrg2</i>             | <i>si:ch211-145n14.1</i>                                                            | gamma-aminobutyric acid (GABA) A receptor, gamma 2                                                           | 0.78 | -0.29 |
| miR-731 | ENSDARG0000000058256 | <i>draxin</i>             | <i>neucrin, zgc:113312, C11H1orf187</i>                                             | dorsal inhibitory axon guidance protein                                                                      | 0.78 | -0.26 |
| miR-731 | ENSDARG000000070918  | <i>si:ch211-284e20.8</i>  | <i>FETUB</i>                                                                        | <i>si:ch211-284e20.8</i> ; orthologous to human <i>FETUB</i> (fetuin B)                                      | 0.77 | -0.22 |
| miR-731 | ENSDARG0000000020031 | <i>cldn11a</i>            | <i>zgc:92247</i>                                                                    | claudin 11a                                                                                                  | 0.77 | -0.22 |
| miR-731 | ENSDARG000000018621  | <i>slc6a19a.1</i>         | <i>slc6a19a, zgc:162095</i>                                                         | solute carrier family 6 member 19a, tandem duplicate 1                                                       | 0.77 | -0.25 |
| miR-731 | ENSDARG000000015860  | <i>mtmr9</i>              | <i>si:dkey-155d18.2</i>                                                             | myotubularin related protein 9                                                                               | 0.77 | -0.26 |
| miR-731 | ENSDARG0000000058082 | <i>birc7</i>              | <i>zgc:165605</i>                                                                   | baculoviral IAP repeat containing 7                                                                          | 0.77 | -0.54 |
| miR-731 | ENSDARG0000000092501 | <i>si:dkey-80c24.5</i>    | N/A                                                                                 | <i>si:dkey-80c24.5</i>                                                                                       | 0.77 | -0.32 |
| miR-731 | ENSDARG000000012248  | <i>rgma</i>               | <i>id:ibd2030, wu:fb72h09, zgc:110534</i>                                           | repulsive guidance molecule BMP co-receptor a                                                                | 0.77 | -0.49 |
| miR-731 | ENSDARG000000017886  | <i>ZBTB11</i>             | <i>man, marsanne, mne, si:dkey-98p3.1, si:dkeyp-116g9.2, wu:fc06h02, wu:fc36e08</i> | zinc finger and BTB domain containing 11                                                                     | 0.77 | -0.44 |
| miR-731 | ENSDARG0000000029290 | <i>stx11b.1</i>           | <i>zgc:77855</i>                                                                    | syntaxin 11b, tandem duplicate 1                                                                             | 0.76 | -0.25 |
| miR-731 | ENSDARG0000000020134 | <i>sipa1ll</i>            | <i>cb600, id:ibd5092, sb:cb600, si:ch211-106p8.1, wu:fc43g06</i>                    | signal-induced proliferation-associated 1 like 1                                                             | 0.76 | -0.21 |
| miR-731 | ENSDARG0000000058535 | <i>si:dkey-211g8.7</i>    | <i>FFAR2</i>                                                                        | <i>si:dkey-211g8.7</i> ; orthologous to human <i>FFAR2</i> (free fatty acid receptor 2)                      | 0.76 | -0.26 |
| miR-731 | ENSDARG0000000061738 | <i>march2</i>             | <i>si:ch211-197g15.3, zgc:158704</i>                                                | membrane-associated ring finger (C3HC4) 2                                                                    | 0.76 | -0.22 |
| miR-731 | ENSDARG0000000074363 | <i>TTC9</i>               | N/A                                                                                 | <i>si:ch211-259k16.3</i>                                                                                     | 0.76 | -0.31 |
| miR-731 | ENSDARG0000000021539 | <i>ephb2b</i>             | <i>fi18g12, wu:fi18g12, zgc:112296</i>                                              | eph receptor B2b                                                                                             | 0.76 | -0.25 |
| miR-731 | ENSDARG0000000028379 | <i>trub2</i>              | <i>fc51e05, wu:fc51e05, zgc:91836</i>                                               | TruB pseudouridine (psi) synthase family member 2                                                            | 0.76 | -0.26 |
| miR-731 | ENSDARG000000004954  | <i>grna</i>               | <i>grn, pgrn-a, progranulin, sb:eu337, wu:fb11g12, wu:fi18f05, zfPGRN-A</i>         | granulin a                                                                                                   | 0.76 | -0.28 |
| miR-731 | ENSDARG0000000039008 | <i>SERP2</i>              | <i>fc56c08, wu:fc56c08, zgc:85858</i>                                               | <i>zgc:85858</i>                                                                                             | 0.75 | -0.24 |
| miR-731 | ENSDARG000000008904  | <i>smarca2</i>            | <i>wu:fa56c07, wu:fi27f11, zgc:66238</i>                                            | SWI/SNF related, matrix associated, actin dependent regulator of chromatin, subfamily a, member 2            | 0.75 | -0.32 |

|         |                     |                          |                                                                                              |                                                                                                   |            |       |
|---------|---------------------|--------------------------|----------------------------------------------------------------------------------------------|---------------------------------------------------------------------------------------------------|------------|-------|
| miR-731 | ENSDARG00000090889  | <i>si:ch211-132p1.3</i>  | <i>zmp:0000001007, BX005069.4, lect2</i>                                                     | <i>si:ch211-132p1.3</i> ; orthologous to human <i>LECT2</i> (leukocyte cell derived chemotaxin 2) | 0.75       | -0.25 |
| miR-731 | ENSDARG00000063544  | <i>pip4k2ab</i>          | <i>si:ch211-279l9.5</i>                                                                      | phosphatidylinositol-5-phosphate 4-kinase, type II, alpha b                                       | 0.75       | -0.33 |
| miR-731 | ENSDARG00000078492  | <i>swi5</i>              | <i>si:ch211-264f7.1</i>                                                                      | SWI5 homologous recombination repair protein                                                      | 0.75       | -0.37 |
| miR-731 | ENSDARG00000074809  | <i>zgc:194392</i>        | <i>fd59g01, wu:fd59g01</i>                                                                   | <i>zgc:194392</i> ; orthologous to human <i>C1orf115</i> (chromosome 1 open reading frame 115)    | 0.75       | -0.26 |
| miR-731 | ENSDARG00000031809  | <i>rbm24b</i>            | <i>zgc:136803</i>                                                                            | RNA binding motif protein 24b                                                                     | 0.75       | -0.36 |
| miR-731 | ENSDARG00000037177  | <i>zc3h13</i>            | <i>zgc:66359</i>                                                                             | zinc finger CCCH-type containing 13                                                               | 0.74       | -0.26 |
| miR-731 | ENSDARG00000059474  | <i>mlxip</i>             | <i>MLx, chrebp, si:ch211-110p13.4, wu:fb38e04</i>                                            | MLX interacting protein                                                                           | 0.74       | -0.37 |
| miR-731 | ENSDARG00000011885  | <i>mrpl19</i>            | <i>wu:fi69e01, zgc:100827</i>                                                                | mitochondrial ribosomal protein L19                                                               | 0.74       | -0.42 |
| miR-731 | ENSDARG00000027183  | <i>namptb</i>            | <i>im:7051384, wu:fc21g12, wu:fc27h03, wu:fd15d03, zgc:55764</i>                             | nicotinamide phosphoribosyltransferase b                                                          | 0.74       | -0.22 |
| miR-731 | ENSDARG00000074262  | <i>nck1a</i>             | <i>si:dkey-4m11.4, nck1</i>                                                                  | NCK adaptor protein 1a                                                                            | 0.74       | -0.23 |
| miR-731 | ENSDARG00000038737  | <i>phf20b</i>            | <i>zgc:91986</i>                                                                             | PHD finger protein 20, b                                                                          | 0.74       | -0.25 |
| miR-731 | ENSDARG00000094491  | <i>si:ch211-202m22.1</i> | N/A                                                                                          | <i>si:ch211-202m22.1</i>                                                                          | 0.74       | -0.31 |
| miR-731 | ENSDARG00000074367  | <i>usp12b</i>            | <i>CR381676.2</i>                                                                            | ubiquitin specific peptidase 12b                                                                  | 0.74       | -0.25 |
| miR-731 | ENSDARG00000007125  | <i>asb6</i>              | <i>zgc:110231</i>                                                                            | ankyrin repeat and SOCS box containing 6                                                          | 0.74       | -0.36 |
| miR-731 | ENSDARG00000018643  | <i>igf2a</i>             | <i>IGF-II, etID31232.25, igf2, igf2b, wu:fc26e03, zgc:91781</i>                              | insulin-like growth factor 2a                                                                     | 0.74       | -0.31 |
| miR-731 | ENSDARG00000028552  | <i>plppr3b</i>           | <i>PRG2A, lppr3, lppr3b, BX000430.1</i>                                                      | phospholipid phosphatase related 3b                                                               | 0.74       | -0.32 |
| miR-731 | ENSDARG00000074597  | <i>lts2a</i>             | <i>lts2, si:dkey-250a11.1</i>                                                                | leucine zipper, putative tumor suppressor 2a                                                      | 0.74       | -0.39 |
| miR-731 | ENSDARG00000054344  | <i>gabpb2b</i>           | <i>im:7142141, si:dkey-77n11.3, zgc:154003</i>                                               | GA binding protein transcription factor subunit beta 2b                                           | 0.73       | -0.40 |
| miR-731 | ENSDARG00000073813  | <i>sclt</i>              | <i>zgc:171514</i>                                                                            | selenocysteine lyase                                                                              | 0.73       | -0.40 |
| miR-731 | ENSDARG00000079784  | <i>si:ch211-235o23.1</i> | <i>TMEM71</i>                                                                                | <i>si:ch211-235o23.1</i> ; orthologous to human <i>TMEM71</i> (transmembrane protein 71)          | 0.73       | -0.29 |
| miR-731 | ENSDARG000000008979 | <i>golga1</i>            | <i>zgc:63688</i>                                                                             | golgin A1                                                                                         | 0.73       | -0.25 |
| miR-731 | ENSDARG00000035398  | <i>enc1</i>              | <i>klhl37, si:dkey-35i22.1</i>                                                               | ectodermal-neural cortex 1                                                                        | 0.73       | -0.22 |
| miR-731 | ENSDARG00000055305  | <i>ret</i>               | <i>c-ret, cret, etID315074.13, ret1, wu:fd13h01</i>                                          | ret proto-oncogene receptor tyrosine kinase                                                       | 0.72       | -0.36 |
| miR-731 | ENSDARG00000043640  | <i>cenpn</i>             | <i>id:ibd2033, si:busm1-241h12.3, si:dz241h12.3, un-named hi3634, unmi hi3634, zgc:92188</i> | centromere protein N                                                                              | 0.72       | -0.28 |
| miR-731 | ENSDARG00000059244  | <i>arfp2a</i>            | <i>fj35g06, wu:fj35g06, zgc:92579</i>                                                        | ADP-ribosylation factor interacting protein 2a                                                    | 0.72       | -0.24 |
| miR-731 | ENSDARG00000061992  | <i>dot1l</i>             | <i>si:dkey-211f22.1</i>                                                                      | DOT1-like histone H3K79 methyltransferase                                                         | 0.72       | -0.21 |
| miR-731 | ENSDARG00000069833  | <i>rhbd12</i>            | <i>zgc:55533</i>                                                                             | rhomboid, veinlet-like 2 (Drosophila)                                                             | 0.72       | -0.31 |
| miR-731 | ENSDARG00000011553  | <i>atp5pb</i>            | <i>atp5f1, fb59g11, fj08b08, wu:fb59g11, wu:fj08b08, zgc:101887</i>                          | ATP synthase peripheral stalk-membrane subunit b                                                  | 0.71       | -0.42 |
| miR-731 | ENSDARG00000006010  | <i>bmi1a</i>             | <i>bmi1, pcg4, psc1, wu:fb17g03, wu:fd18f06</i>                                              | bmi1 polycomb ring finger oncogene 1a                                                             | 0.71       | -0.22 |
| miR-731 | ENSDARG00000077265  | <i>wdr89</i>             | N/A                                                                                          | WD repeat domain 89                                                                               | 0.71       | -0.23 |
| miR-731 | ENSDARG00000007216  | <i>abce1</i>             | <i>wu:fb34c09, wu:fe47b01, wu:fi09g07, zgc:111906, zgc:56045</i>                             | ATP-binding cassette, sub-family E (OABP), member 1                                               | 0.71       | -0.34 |
| miR-731 | ENSDARG00000070567  | <i>cadpsb</i>            | N/A                                                                                          | Ca <sup>2+</sup> -dependent activator protein for secretion b                                     | 0.71       | -0.31 |
| miR-731 | ENSDARG00000044827  | <i>wnt7aa</i>            | <i>wnt7a</i>                                                                                 | wingless-type MMTV integration site family, member 7Aa                                            | 0.71       | -0.54 |
| miR-731 | ENSDARG000000076170 | <i>pcsk1nl</i>           | <i>proSAAS, uo:ion003, wu:fj32g06</i>                                                        | proprotein convertase subtilisin/kexin type 1 inhibitor, like                                     | 0.70       | -0.31 |
| miR-731 | ENSDARG00000077096  | <i>fncl7a</i>            | <i>fncl7, si:dkeyp-51f11.6</i>                                                               | fibronectin type III domain containing 7a                                                         | 0.70       | -0.24 |
| miR-731 | ENSDARG00000079414  | <i>sez6b</i>             | N/A                                                                                          | seizure related 6 homolog b                                                                       | 0.70       | -0.21 |
| miR-731 | ENSDARG00000078576  | <i>setd5</i>             | N/A                                                                                          | SET domain containing 5                                                                           | 0.70       | -0.38 |
| miR-731 | ENSDARG00000091817  | <i>CR391998.1</i>        | N/A                                                                                          | putative protein TPRXL                                                                            | 0.70       | -0.29 |
| miR-731 | ENSDARG00000053857  | <i>ccdc187</i>           | <i>zgc:162431</i>                                                                            | coiled-coil domain containing 187                                                                 | 0.70       | -0.24 |
| miR-731 | ENSDARG00000042115  | <i>tmem198a</i>          | <i>si:rp71-68g1.6</i>                                                                        | transmembrane protein 198a                                                                        | 0.70       | -0.31 |
| miR-731 | ENSDARG00000020278  | <i>si:dkeyp-120h9.1</i>  | N/A                                                                                          | <i>si:dkeyp-120h9.1</i> ; orthologous to human <i>SLC7A13</i> (solute carrier family 7 member 13) | 0.70       | -0.72 |
| miR-26  | ENSDARG00000059801  | <i>pdzd2</i>             | <i>si:dkey-3h3.1</i>                                                                         | PDZ domain containing 2                                                                           | 0.96/0.97* | -0.58 |
| miR-26  | ENSDARG00000087176  | <i>rskr</i>              | <i>rskr, sgk494a, si:dkeyp-118e10.5, AL954372.2</i>                                          | ribosomal protein S6 kinase related a                                                             | 0.96/0.96  | -0.51 |
| miR-26  | ENSDARG00000025766  | <i>zgc:66440</i>         | <i>fj25g12, wu:fj25g12, DTX3</i>                                                             | <i>zgc:66440</i>                                                                                  | 0.72/-     | -0.48 |
| miR-26  | ENSDARG00000055108  | <i>gdel</i>              | <i>zgc:56068, zgc:77135</i>                                                                  | glycerophosphodiester phosphodiesterase 1                                                         | 0.94/0.94  | -0.47 |
| miR-26  | ENSDARG00000009901  | <i>slc38a5a</i>          | <i>fk81c02, si:dkey-48j7.5, wu:fk81c02</i>                                                   | solute carrier family 38 member 5a                                                                | 0.93/0.91  | -0.46 |

|        |                     |                        |                                                                         |                                                                                                           |           |       |
|--------|---------------------|------------------------|-------------------------------------------------------------------------|-----------------------------------------------------------------------------------------------------------|-----------|-------|
| miR-26 | ENSDARG00000040684  | <i>plcd4b</i>          | <i>DrPLC-delta 4B, plcd4</i>                                            | phospholipase C, delta 4b                                                                                 | 0.83/0.84 | -0.46 |
| miR-26 | ENSDARG00000074301  | <i>cth</i>             | <i>fb58d08, wu:fb48e03, wu:fb58d08, zgc:66001, zgc:85785</i>            | cystathionase (cystathionine gamma-lyase)                                                                 | 0.91/0.90 | -0.44 |
| miR-26 | ENSDARG00000052438  | <i>actr2a</i>          | <i>actr2, hm:zeh1257, zgc:63719</i>                                     | actin related protein 2a                                                                                  | 0.78/0.80 | -0.43 |
| miR-26 | ENSDARG00000078585  | <i>mon1a</i>           | <i>zgc:162873</i>                                                       | MON1 secretory trafficking family member A                                                                | 0.91/0.90 | -0.43 |
| miR-26 | ENSDARG00000044183  | <i>prkab1a</i>         | <i>zgc:92228</i>                                                        | protein kinase, AMP-activated, beta 1 non-catalytic subunit, a                                            | 0.73/0.71 | -0.43 |
| miR-26 | ENSDARG00000001898  | <i>manea</i>           | <i>fi29h09, wu:fi29h09, zgc:92825</i>                                   | mannosidase, endo-alpha                                                                                   | 0.90/0.91 | -0.42 |
| miR-26 | ENSDARG00000043026  | <i>ttbk2b</i>          | <i>ff62e10, sb:eu1102, si:dkey-12h9.11, si:dkey-12h9.14, wu:ff62e10</i> | tau tubulin kinase 2b                                                                                     | 0.81/0.81 | -0.41 |
| miR-26 | ENSDARG00000028027  | <i>trim63a</i>         | <i>MuRF1A, fc50c07, murf1, trim63, wu:fc50c07, zgc:86757</i>            | tripartite motif containing 63a                                                                           | 0.91/0.93 | -0.40 |
| miR-26 | ENSDARG00000036066  | <i>si:dkey-78a14.4</i> | N/A                                                                     | <i>si:dkey-78a14.4</i> ; orthologous to several human genes including <i>NAT1</i> (N-acetyltransferase 1) | 0.70/-    | -0.40 |
| miR-26 | ENSDARG00000006220  | <i>ugt1a1</i>          | <i>ugt1ab</i>                                                           | UDP glucuronosyltransferase 1 family, polypeptide A1                                                      | 0.93/0.92 | -0.39 |
| miR-26 | ENSDARG00000052386  | <i>cldnd1b</i>         | <i>cldnd1</i>                                                           | claudin domain containing 1b                                                                              | 0.82/0.81 | -0.38 |
| miR-26 | ENSDARG00000017427  | <i>phf20l1</i>         | <i>fi20g04, si:dkey-97i18.2, wu:fi20g04</i>                             | PHD finger protein 20 like 1                                                                              | 0.95/0.95 | -0.38 |
| miR-26 | ENSDARG00000003259  | <i>lox</i>             | <i>lox, zgc:77447</i>                                                   | lysyl oxidase a                                                                                           | 0.94/0.94 | -0.37 |
| miR-26 | ENSDARG00000039966  | <i>prom1a</i>          | <i>fb75c01, prom1, prom1l, wu:fb75c01</i>                               | prominin 1a                                                                                               | 0.88/0.87 | -0.37 |
| miR-26 | ENSDARG00000015184  | <i>mpp3a</i>           | <i>mpp3, si:ch73-368i2.1, zmp:0000000552</i>                            | membrane protein, palmitoylated 3a (MAGUK p55 subfamily member 3)                                         | 0.86/0.86 | -0.37 |
| miR-26 | ENSDARG00000088377  | <i>rp111b</i>          | <i>si:dkey-33i22.3</i>                                                  | <i>rp1 like 1b</i> ; orthologous to human <i>RP111</i>                                                    | 0.88/0.88 | -0.36 |
| miR-26 | ENSDARG00000002696  | <i>gnb3b</i>           | <i>gnb3, wu:fk54b04, zgc:73058, zgc:77780</i>                           | guanine nucleotide binding protein (G protein), beta polypeptide 3b                                       | 0.86/0.86 | -0.36 |
| miR-26 | ENSDARG00000038296  | <i>tmem86b</i>         | <i>zgc:153124</i>                                                       | transmembrane protein 86B                                                                                 | 0.82/0.81 | -0.36 |
| miR-26 | ENSDARG00000091548  | <i>stard9</i>          | <i>BX569781.2</i>                                                       | StAR-related lipid transfer (START) domain containing 9                                                   | 0.91/0.90 | -0.36 |
| miR-26 | ENSDARG00000045586  | <i>zgc:172145</i>      | N/A                                                                     | <i>zgc:172145</i> ; orthologous to human <i>FTL</i> (ferritin light chain)                                | 0.96/0.97 | -0.36 |
| miR-26 | ENSDARG00000058486  | <i>caps2</i>           | <i>si:ch73-86n2.3</i>                                                   | calcyphosine 2                                                                                            | 0.78/0.78 | -0.36 |
| miR-26 | ENSDARG00000007485  | <i>epc2</i>            | <i>zgc:55784</i>                                                        | enhancer of polycomb homolog 2 (Drosophila)                                                               | 0.99/0.99 | -0.35 |
| miR-26 | ENSDARG00000028088  | <i>galk1</i>           | <i>zgc:101541</i>                                                       | galactokinase 1                                                                                           | 0.79/0.81 | -0.35 |
| miR-26 | ENSDARG00000016584  | <i>rgs7a</i>           | <i>rgs7, zgc:92793</i>                                                  | regulator of G protein signaling 7a                                                                       | 0.83/0.85 | -0.35 |
| miR-26 | ENSDARG00000016141  | <i>slc6a2</i>          | <i>si:dkey-182h7.3</i>                                                  | solute carrier family 6 member 2                                                                          | 0.76/0.76 | -0.35 |
| miR-26 | ENSDARG000000021255 | <i>arhgap22</i>        | <i>si:ch211-223a10.2</i>                                                | Rho GTPase activating protein 22                                                                          | -/0.71    | -0.35 |
| miR-26 | ENSDARG00000076844  | <i>plin6</i>           | <i>zgc:162150</i>                                                       | perilipin 6                                                                                               | 0.72/0.72 | -0.34 |
| miR-26 | ENSDARG00000005236  | <i>srcap</i>           | <i>im:7137889, im:7138264</i>                                           | Snf2-related CREBBP activator protein                                                                     | 0.90/0.90 | -0.34 |
| miR-26 | ENSDARG00000058978  | <i>zgc:113423</i>      | <i>BEND2</i>                                                            | <i>zgc:113423</i> ; orthologous to human <i>BEND2</i> (BEN domain containing 2)                           | 0.98/0.96 | -0.34 |
| miR-26 | ENSDARG00000069045  | <i>cht8</i>            | <i>si:ch211-218c6.5, zgc:158641</i>                                     | CTF8, chromosome transmission fidelity factor 8 homolog (S. cerevisiae)                                   | 0.78/0.79 | -0.34 |
| miR-26 | ENSDARG00000063414  | <i>rxylt1</i>          | <i>tmem5, zgc:153239</i>                                                | ribitol xylosyltransferase 1                                                                              | 0.91/0.93 | -0.34 |
| miR-26 | ENSDARG00000079500  | <i>kif3cb</i>          | <i>kif3c, kif3c-like</i>                                                | kinesin family member 3Cb                                                                                 | 0.80/0.79 | -0.34 |
| miR-26 | ENSDARG00000022550  | <i>gxylt1b</i>         | <i>gl18d3, gxylt1, si:ch211-155a11.6</i>                                | glucoside xylosyltransferase 1b                                                                           | 0.91/0.90 | -0.34 |
| miR-26 | ENSDARG00000016022  | <i>zic5</i>            | N/A                                                                     | zic family member 5 (odd-paired homolog, Drosophila)                                                      | 0.99/0.99 | -0.34 |
| miR-26 | ENSDARG00000060354  | <i>samd7</i>           | <i>si:dkey-52k20.12</i>                                                 | sterile alpha motif domain containing 7                                                                   | 0.87/0.87 | -0.33 |
| miR-26 | ENSDARG00000060921  | <i>pla2g6</i>          | <i>wu:fc06g09, zgc:77476</i>                                            | phospholipase A2, group VI (cytosolic, calcium-independent)                                               | 0.84/0.82 | -0.33 |
| miR-26 | ENSDARG00000003167  | <i>mlst8</i>           | <i>fi37e04, gbl, wu:fi37e04, zgc:55455, zgc:85668</i>                   | MTOR associated protein, LST8 homolog (S. cerevisiae)                                                     | 0.94/0.94 | -0.33 |
| miR-26 | ENSDARG00000075612  | <i>ercc6</i>           | N/A                                                                     | excision repair cross-complementation group 6                                                             | 0.85/0.86 | -0.33 |
| miR-26 | ENSDARG00000044513  | <i>tpst1l</i>          | N/A                                                                     | tyrosylprotein sulfotransferase 1, like                                                                   | 0.77/0.75 | -0.33 |
| miR-26 | ENSDARG00000058608  | <i>wsb2</i>            | <i>si:ch73-263f13.4</i>                                                 | WD repeat and SOCS box containing 2                                                                       | 0.79/0.82 | -0.33 |
| miR-26 | ENSDARG00000052121  | <i>rag2</i>            | <i>zgc:136743</i>                                                       | recombination activating gene 2                                                                           | 0.82/0.83 | -0.33 |
| miR-26 | ENSDARG00000002771  | <i>slc4a5a</i>         | <i>si:ch211-48m9.1</i>                                                  | <i>solute carrier family 4 member 5a</i>                                                                  | 0.89/0.88 | -0.33 |
| miR-26 | ENSDARG00000058548  | <i>bves</i>            | <i>pop1, popdc1, zgc:86887</i>                                          | blood vessel epicardial substance                                                                         | 0.76/0.76 | -0.33 |
| miR-26 | ENSDARG00000039563  | <i>lox13b</i>          | <i>ff60c12, im:7157119, wu:ff60c12, zgc:162959</i>                      | lysyl oxidase-like 3b                                                                                     | 0.75/0.74 | -0.32 |
| miR-26 | ENSDARG00000045601  | <i>cax1</i>            | <i>si:dkey-180p18.2, wu:fc25f10, zgc:136271</i>                         | cation/H <sup>+</sup> exchanger protein 1                                                                 | 0.81/0.80 | -0.32 |
| miR-26 | ENSDARG00000044325  | <i>zgc:193690</i>      | <i>sb:eu534, zgc:193696</i>                                             | <i>zgc:193690</i> ; Orthologous to human iand <i>DDX19B</i> (DEAD-box helicase 19A and 19B)               | 0.83/0.83 | -0.32 |
| miR-26 | ENSDARG00000069538  | <i>gtf3c4</i>          | <i>im:7138272, si:dkeyp-10e10.3</i>                                     | general transcription factor IIIC, polypeptide 4                                                          | 0.76/0.75 | -0.32 |
| miR-26 | ENSDARG00000034427  | <i>jpt2</i>            | <i>fc04g11, hn11, wu:fb37f03, wu:fc04g11, zgc:55712</i>                 | Jupiter microtubule associated homolog 2                                                                  | 0.77/0.77 | -0.32 |
| miR-26 | ENSDARG00000079712  | <i>gal3st4</i>         | <i>fb92g05, wu:fb92g05</i>                                              | galactose-3-O-sulfotransferase 4                                                                          | 0.83/0.84 | -0.32 |
| miR-26 | ENSDARG00000058357  | <i>ankrd33ba</i>       | <i>si:rp71-1f1.8</i>                                                    | ankyrin repeat domain 33ba                                                                                | 0.71/0.72 | -0.32 |



|        |                     |                          |                                                                                         |                                                                        |           |       |
|--------|---------------------|--------------------------|-----------------------------------------------------------------------------------------|------------------------------------------------------------------------|-----------|-------|
| miR-26 | ENSDARG00000045911  | <i>tulp4a</i>            | <i>fb99g11, si:ch211-222h17.4, si:ch211-51e12.5, tulp4, wu:fb75h04, wu:fb99g11</i>      | TUB like protein 4a                                                    | 0.87/0.89 | -0.31 |
| miR-26 | ENSDARG00000021664  | <i>fzd3a</i>             | <i>fz3a, fz9, fzd3, off-limits, olt, zg09</i>                                           | frizzled class receptor 3a                                             | 0.90/0.89 | -0.31 |
| miR-26 | ENSDARG000000041081 | <i>kmt5b</i>             | <i>suv420h1, wu:fb97g06, wu:fi57g03, zgc:103527</i>                                     | lysine methyltransferase 5B                                            | 0.88/0.88 | -0.31 |
| miR-26 | ENSDARG00000039390  | <i>sdhaf4</i>            | <i>si:busm1-265n4.4, si:busm1-46p4.2, si:ch211-103o12.3, C13H6orf57</i>                 | succinate dehydrogenase complex assembly factor 4                      | 0.85/0.82 | -0.31 |
| miR-26 | ENSDARG00000069540  | <i>si:dkey-30c15.2</i>   | N/A                                                                                     | <i>si:dkey-30c15.2</i>                                                 | 0.85/0.87 | -0.31 |
| miR-26 | ENSDARG00000054937  | <i>badb</i>              | <i>bad, fa01b12, proapoptotic BH3-only protein, wu:fa01b12, wu:fa96d04</i>              | BCL2 associated agonist of cell death b                                | 0.93/0.93 | -0.31 |
| miR-26 | ENSDARG00000079730  | <i>fuz</i>               | N/A                                                                                     | fuzzy planar cell polarity protein                                     | 0.92/0.90 | -0.31 |
| miR-26 | ENSDARG00000009021  | <i>chrna1</i>            | <i>AChR alpha 1, nic, nic-1, nic1, nicotinic receptor, zgc:86593</i>                    | cholinergic receptor, nicotinic, alpha 1 (muscle)                      | 0.76/0.76 | -0.31 |
| miR-26 | ENSDARG00000030512  | <i>tsnaxip1</i>          | <i>wu:fc26b06, zgc:162756</i>                                                           | translin-associated factor X interacting protein 1                     | 0.89/0.89 | -0.31 |
| miR-26 | ENSDARG00000017741  | <i>g3bp1</i>             | <i>fl17h05, wu:fl17h05, zgc:56034</i>                                                   | GTPase activating protein (SH3 domain) binding protein 1               | 0.94/0.94 | -0.31 |
| miR-26 | ENSDARG00000078592  | <i>nomo</i>              | <i>loc283820</i>                                                                        | nodal modulator                                                        | 0.80/0.74 | -0.31 |
| miR-26 | ENSDARG00000088290  | <i>foxj1b</i>            | <i>fl67h07, foxj1.2, wu:fl67h07, zgc:101713</i>                                         | forkhead box J1b                                                       | 0.74/0.75 | -0.31 |
| miR-26 | ENSDARG00000074527  | <i>chst15</i>            | <i>si:dkey-59k9.3</i>                                                                   | carbohydrate (N-acetylgalactosamine 4-sulfate 6-O) sulfotransferase 15 | 0.86/0.82 | -0.30 |
| miR-26 | ENSDARG00000077950  | <i>tor1</i>              | <i>im:7165310, si:ch73-178d14.1</i>                                                     | torsin family 1                                                        | 0.73/0.73 | -0.30 |
| miR-26 | ENSDARG00000022183  | <i>gstol</i>             | <i>fd58h04, wu:fd58h04, zgc:92254</i>                                                   | glutathione S-transferase omega 1                                      | 0.81/0.84 | -0.30 |
| miR-26 | ENSDARG00000011605  | <i>dennd6b</i>           | <i>fam116b, fl67e07, wu:fl67e07, zgc:55619</i>                                          | DENN/MADD domain containing 6B                                         | 0.90/0.88 | -0.30 |
| miR-26 | ENSDARG000000027199 | <i>smad1</i>             | <i>SMA- and MAD-related protein 1, fb39h09, madh1, sb:eu786, wu:fb39h09, wu:fb97e04</i> | SMAD family member 1                                                   | 0.93/0.92 | -0.30 |
| miR-26 | ENSDARG00000055070  | <i>borcs7</i>            | <i>zgc:114169, C13H10orf32</i>                                                          | BLOC-1 related complex subunit 7                                       | 0.70/0.70 | -0.30 |
| miR-26 | ENSDARG000000092949 | <i>si:ch73-366i20.1</i>  | N/A                                                                                     | <i>si:ch73-366i20.1</i>                                                | 0.76/0.79 | -0.30 |
| miR-26 | ENSDARG000000068551 | <i>elovl8a</i>           | <i>zgc:153394</i>                                                                       | ELOVL fatty acid elongase 8a                                           | 0.76/0.76 | -0.30 |
| miR-26 | ENSDARG00000020618  | <i>gatd3a</i>            | <i>zgc:112056, C9H21orf33</i>                                                           | glutamine amidotransferase like class 1 domain containing 3A           | 0.77/0.77 | -0.30 |
| miR-26 | ENSDARG00000030616  | <i>nfe2l1a</i>           | <i>nfe2l1, nrfla</i>                                                                    | nuclear factor, erythroid 2-like 1a                                    | 0.88/0.88 | -0.30 |
| miR-26 | ENSDARG000000060383 | <i>mmaa</i>              | <i>zgc:171657</i>                                                                       | metabolism of cobalamin associated A                                   | 0.88/0.87 | -0.29 |
| miR-26 | ENSDARG000000002959 | <i>gpr34b</i>            | <i>zgc:110315</i>                                                                       | G protein-coupled receptor 34b                                         | 0.84/0.83 | -0.29 |
| miR-26 | ENSDARG000000012025 | <i>hs6st2</i>            | <i>fb80f12, hs6st, wu:fb80f12</i>                                                       | heparan sulfate 6-O-sulfotransferase 2                                 | 0.84/0.82 | -0.29 |
| miR-26 | ENSDARG00000073948  | <i>prok1</i>             | <i>zgc:171925</i>                                                                       | prokineticin 1                                                         | 0.70/0.70 | -0.29 |
| miR-26 | ENSDARG00000040607  | <i>rtf2</i>              | <i>rtfdcl, wu:fd99e08, zgc:55448, zgc:86650, C6H20orf43</i>                             | replication termination factor 2                                       | 0.90/0.91 | -0.29 |
| miR-26 | ENSDARG00000075721  | <i>zdhhc6</i>            | <i>fa04d12, fc30b09, wu:fa04d12, wu:fc30b09</i>                                         | zinc finger DHHC-type containing 6                                     | 0.90/0.90 | -0.29 |
| miR-26 | ENSDARG00000070256  | <i>suz12a</i>            | <i>suz12, suz12l, zgc:100863</i>                                                        | SUZ12 polycomb repressive complex 2 subunit a                          | 0.71/0.71 | -0.29 |
| miR-26 | ENSDARG00000036864  | <i>slc34a2b</i>          | <i>NaPi-IIb2, wu:fi68d06</i>                                                            | solute carrier family 34 member 2b                                     | 0.76/0.75 | -0.29 |
| miR-26 | ENSDARG00000012860  | <i>tmprss4b</i>          | <i>si:ch211-139a5.13, si:ch211-139a5.6, wu:fi21e09, wu:fk84e06</i>                      | transmembrane serine protease 4b                                       | 0.90/0.87 | -0.29 |
| miR-26 | ENSDARG00000078891  | <i>map11</i>             | <i>C7orf43</i>                                                                          | microtubule associated protein 1                                       | 0.81/0.81 | -0.29 |
| miR-26 | ENSDARG00000012932  | <i>mat2b</i>             | <i>fc55d01, wu:fb48h02, wu:fc55d01, zgc:110308</i>                                      | methionine adenosyltransferase II, beta                                | 0.76/0.76 | -0.29 |
| miR-26 | ENSDARG000000032103 | <i>mapk6</i>             | <i>ERK3, si:ch211-235f12.1</i>                                                          | mitogen-activated protein kinase 6                                     | 0.84/0.81 | -0.29 |
| miR-26 | ENSDARG00000017803  | <i>gsk3ba</i>            | <i>GSK-3[b], fb68h05, fk80d11, gsk3b, wu:fb68h05, wu:fk80d11</i>                        | glycogen synthase kinase 3 beta, genome duplicate a                    | 0.84/0.85 | -0.28 |
| miR-26 | ENSDARG00000035986  | <i>ptpn2b</i>            | <i>cb806, ptpn2, ptpn2l, wu:fc10h07, zgc:55339, zgc:76973</i>                           | protein tyrosine phosphatase non-receptor type 2b                      | 0.85/0.85 | -0.28 |
| miR-26 | ENSDARG000000043857 | <i>ubfm1</i>             | <i>ubfm1, wu:fa10f05, wu:fb72g01, zgc:55335</i>                                         | ubiquitin-fold modifier 1                                              | 0.72/0.71 | -0.28 |
| miR-26 | ENSDARG00000010841  | <i>fshb</i>              | <i>FSH Beta, FSHB, Gth I, gthl</i>                                                      | follicle stimulating hormone subunit beta                              | 0.88/0.88 | -0.28 |
| miR-26 | ENSDARG00000054208  | <i>phkg2</i>             | <i>zgc:55863</i>                                                                        | phosphorylase kinase, gamma 2 (testis)                                 | 0.86/0.86 | -0.28 |
| miR-26 | ENSDARG00000040161  | <i>zgc:92287</i>         | N/A                                                                                     | <i>zgc:92287</i>                                                       | 0.75/0.74 | -0.28 |
| miR-26 | ENSDARG00000056196  | <i>slc2a2</i>            | <i>wu:fb62h10, zglut2</i>                                                               | solute carrier family 2 member 2                                       | 0.77/0.77 | -0.28 |
| miR-26 | ENSDARG00000009681  | <i>med27</i>             | <i>crsp34, crsp8, trap37, zgc:66302</i>                                                 | mediator complex subunit 27                                            | 0.83/0.83 | -0.28 |
| miR-26 | ENSDARG00000024503  | <i>c6ast3</i>            | <i>zgc:103606</i>                                                                       | six-cysteine containing astacin protease 3                             | 0.75/0.75 | -0.28 |
| miR-26 | ENSDARG000000091678 | <i>ints12</i>            | <i>wu:fi17f05, zgc:86602</i>                                                            | integrator complex subunit 12                                          | 0.78/0.77 | -0.28 |
| miR-26 | ENSDARG00000008986  | <i>e2f7</i>              | <i>fc43h03, si:dkey-217k21.2, wu:fc43h03</i>                                            | E2F transcription factor 7                                             | 0.77/0.76 | -0.28 |
| miR-26 | ENSDARG00000053569  | <i>sox3</i>              | <i>id:ibd2036, sb:cb493, wu:fd02a08, zgc:110279</i>                                     | SRV-box transcription factor 3                                         | 0.92/0.92 | -0.28 |
| miR-26 | ENSDARG00000093378  | <i>si:ch211-235i11.5</i> | <i>CR382385.3</i>                                                                       | <i>si:ch211-235i11.5</i>                                               | 0.82/0.82 | -0.28 |

|        |                     |                         |                                                                                                       |                                                                                             |           |       |
|--------|---------------------|-------------------------|-------------------------------------------------------------------------------------------------------|---------------------------------------------------------------------------------------------|-----------|-------|
| miR-26 | ENSDARG00000018190  | <i>get3</i>             | <i>asna1, trc40, wu:fd05d03, zgc:56540, zgc:86799</i>                                                 | guided entry of tail-anchored proteins factor 3, ATPase                                     | 0.80/0.80 | -0.28 |
| miR-26 | ENSDARG00000016837  | <i>glipr2l</i>          | <i>wu:fj53e10, zgc:103578</i>                                                                         | GLI pathogenesis-related 2, like                                                            | 0.80/0.80 | -0.28 |
| miR-26 | ENSDARG00000018643  | <i>igf2a</i>            | <i>IGF-II, etID31232.25, igf2, igf2b, wu:fc26e03, zgc:91781</i>                                       | insulin-like growth factor 2a                                                               | 0.79/0.79 | -0.28 |
| miR-26 | ENSDARG00000025679  | <i>comtb</i>            | <i>si:dkey-13a21.15, zgc:162236</i>                                                                   | catechol-O-methyltransferase b                                                              | 0.75/0.75 | -0.28 |
| miR-26 | ENSDARG00000035719  | <i>arl5c</i>            | <i>zgc:77751</i>                                                                                      | ADP-ribosylation factor-like 5C                                                             | 0.77/0.76 | -0.28 |
| miR-26 | ENSDARG00000052527  | <i>mul1b</i>            | <i>im:7146383, zgc:165594</i>                                                                         | mitochondrial E3 ubiquitin protein ligase 1b                                                | 0.79/0.77 | -0.27 |
| miR-26 | ENSDARG00000034643  | <i>fh13a</i>            | <i>fd57e01, fh13, wu:fd57e01</i>                                                                      | four and a half LIM domains 3a                                                              | 0.70/-    | -0.27 |
| miR-26 | ENSDARG00000092199  | <i>si:ch211-250c4.4</i> | N/A                                                                                                   | <i>si:ch211-250c4.4</i>                                                                     | 0.71/0.73 | -0.27 |
| miR-26 | ENSDARG00000069980  | <i>lman1</i>            | <i>fc54c09, fi36e01, wu:fc54c09, wu:fi36e01</i>                                                       | lectin, mannose-binding, 1                                                                  | 0.71/0.72 | -0.27 |
| miR-26 | ENSDARG00000036584  | <i>st8sia5</i>          | N/A                                                                                                   | ST8 alpha-N-acetyl-neuraminide alpha-2,8-sialyltransferase 5                                | 0.94/0.95 | -0.27 |
| miR-26 | ENSDARG00000056381  | <i>cfap97</i>           | <i>fj68c08, wu:fj68c08, zgc:85910</i>                                                                 | cilia and flagella associated protein 97                                                    | 0.81/0.77 | -0.27 |
| miR-26 | ENSDARG00000068883  | <i>tspan13a</i>         | <i>zgc:91858</i>                                                                                      | tetraspanin 13a                                                                             | 0.82/0.81 | -0.27 |
| miR-26 | ENSDARG00000060054  | <i>epc1b</i>            | <i>zgc:158364</i>                                                                                     | enhancer of polycomb homolog 1 (Drosophila) b                                               | 0.99/0.99 | -0.27 |
| miR-26 | ENSDARG00000079688  | <i>tnrc6a</i>           | <i>wu:fc10d10</i>                                                                                     | trinucleotide repeat containing adaptor 6A                                                  | 0.99/0.99 | -0.27 |
| miR-26 | ENSDARG00000078759  | <i>dna2</i>             | <i>si:ch211-1n9.7</i>                                                                                 | DNA replication helicase/nuclease 2                                                         | 0.85/0.85 | -0.27 |
| miR-26 | ENSDARG00000057736  | <i>ano10</i>            | <i>ano10, fc37b04, wu:fc37b04, zgc:114140</i>                                                         | anoctamin 10a                                                                               | 0.71/0.70 | -0.27 |
| miR-26 | ENSDARG00000090646  | <i>tnk2a</i>            | <i>acka, si:dkey-150o13.3</i>                                                                         | tyrosine kinase, non-receptor, 2a                                                           | 0.71/0.71 | -0.27 |
| miR-26 | ENSDARG00000029724  | <i>pqbp1</i>            | <i>pqbp1l, si:dz150f13.4, zgc:92646</i>                                                               | polyglutamine binding protein 1                                                             | 0.74/0.75 | -0.26 |
| miR-26 | ENSDARG00000027590  | <i>sept2</i>            | <i>nedd5, wu:fb52g01, wu:fb99a01</i>                                                                  | septin 2                                                                                    | 0.76/0.75 | -0.26 |
| miR-26 | ENSDARG00000021345  | <i>prph2lb</i>          | <i>prph2l, si:dkey-85n7.2</i>                                                                         | peripherin 2-like b                                                                         | 0.83/0.81 | -0.26 |
| miR-26 | ENSDARG00000078430  | <i>tiam1a</i>           | <i>tiam1</i>                                                                                          | TIAM Rac1 associated GEF 1a                                                                 | 0.74/0.73 | -0.26 |
| miR-26 | ENSDARG00000004082  | <i>cx39.9</i>           | <i>cx46l, zgc:110668</i>                                                                              | connexin 39.9                                                                               | 0.82/0.82 | -0.26 |
| miR-26 | ENSDARG00000031929  | <i>stard14</i>          | <i>stard10, wu:fc41g06, zgc:56270, zgc:77753</i>                                                      | START domain containing 14                                                                  | 0.73/0.73 | -0.26 |
| miR-26 | ENSDARG00000010347  | <i>acer1</i>            | <i>zgc:110285</i>                                                                                     | alkaline ceramidase 1                                                                       | 0.74/0.74 | -0.26 |
| miR-26 | ENSDARG00000055752  | <i>npas4a</i>           | <i>npas4, wu:fj52d04, zgc:136764</i>                                                                  | neuronal PAS domain protein 4a                                                              | 0.74/0.74 | -0.26 |
| miR-26 | ENSDARG00000045360  | <i>flj11011l</i>        | <i>zgc:136503</i>                                                                                     | hypothetical protein FLJ11011-like (H. sapiens)                                             | 0.90/0.87 | -0.26 |
| miR-26 | ENSDARG00000052304  | <i>uqcrc1</i>           | <i>zgc:73404, zgc:85750</i>                                                                           | ubiquinol-cytochrome c reductase core protein 1                                             | 0.73/0.72 | -0.26 |
| miR-26 | ENSDARG00000040284  | <i>si:dkey-79d12.5</i>  | <i>BX005256.1</i>                                                                                     | <i>si:dkey-79d12.5</i> ; orthologous to human <i>BTG3</i> (BTG anti-proliferation factor 3) | 0.82/0.80 | -0.26 |
| miR-26 | ENSDARG00000045910  | <i>tmem18l</i>          | <i>si:ch211-222h17.5, si:ch211-51e12.4</i>                                                            | transmembrane protein 181                                                                   | 0.87/0.87 | -0.26 |
| miR-26 | ENSDARG00000055381  | <i>bambia</i>           | <i>Zfma, bambi, cb998, etID64300.12, fc44c12, id:ibd5020, nma, wu:fc44c12, wu:fe01e03</i>             | BMP and activin membrane-bound inhibitor (Xenopus laevis) homolog a                         | 0.93/0.91 | -0.26 |
| miR-26 | ENSDARG00000070348  | <i>hoxc10a</i>          | <i>hoxc10, z-81</i>                                                                                   | homeobox C10a                                                                               | 0.94/0.94 | -0.26 |
| miR-26 | ENSDARG000000091539 | <i>ptprjb.1</i>         | <i>density-enhanced phosphatase-1b, dep1b, ptprib</i>                                                 | protein tyrosine phosphatase receptor type Jb, tandem duplicate 1                           | 0.77/0.78 | -0.25 |
| miR-26 | ENSDARG00000075092  | <i>si:dkey-52l18.4</i>  | <i>sc:d808</i>                                                                                        | <i>si:dkey-52l18.4</i>                                                                      | 0.77/0.77 | -0.25 |
| miR-26 | ENSDARG00000016093  | <i>qtrt2</i>            | <i>qtrtd1</i>                                                                                         | queuine tRNA-ribosyltransferase accessory subunit 2                                         | 0.73/0.75 | -0.25 |
| miR-26 | ENSDARG00000062550  | <i>rc3h1a</i>           | <i>rc3h1, si:dkey-192m14.4</i>                                                                        | ring finger and CCCH-type domains 1a                                                        | 0.85/0.85 | -0.25 |
| miR-26 | ENSDARG00000057699  | <i>styx</i>             | <i>si:ch211-270g19.2, zgc:110621</i>                                                                  | serine/threonine/tyrosine interacting protein                                               | 0.74/0.76 | -0.25 |
| miR-26 | ENSDARG00000040988  | <i>tpi1b</i>            | <i>DrTPI-B, cb179, wu:fb51c02</i>                                                                     | triosephosphate isomerase 1b                                                                | 0.89/0.89 | -0.25 |
| miR-26 | ENSDARG00000063014  | <i>dbpa</i>             | <i>dbp1, si:dkey-109n11.1, zdbp1</i>                                                                  | D site albumin promoter binding protein a                                                   | 0.71/0.71 | -0.25 |
| miR-26 | ENSDARG00000028213  | <i>ttn.2</i>            | <i>ttna, TTN2, pickwick, pik, si:busm1-258d18.1, si:dz258d18.1, ttn, ttna, wu:fi04b11, wu:fi20g08</i> | titin, tandem duplicate 2                                                                   | 0.92/0.92 | -0.25 |
| miR-26 | ENSDARG00000010276  | <i>ptgs2b</i>           | <i>Cox-2b, si:dkey-97o5.6</i>                                                                         | prostaglandin-endoperoxide synthase 2b                                                      | 0.72/0.72 | -0.25 |
| miR-26 | ENSDARG00000053362  | <i>cilp</i>             | <i>im:7137994</i>                                                                                     | cartilage intermediate layer protein, nucleotide pyrophosphohydrolase                       | 0.77/0.76 | -0.25 |
| miR-26 | ENSDARG00000020893  | <i>slc25a55a</i>        | <i>cb229, sb:cb229, slc25a22, wu:fa12h05, wu:fb72h03, zgc:56592</i>                                   | solute carrier family 25 member 55a                                                         | 0.72/0.72 | -0.25 |
| miR-26 | ENSDARG00000075560  | <i>kmt2cb</i>           | <i>ml13b, si:dkey-193e13.2</i>                                                                        | lysine (K)-specific methyltransferase 2Cb                                                   | 0.77/0.76 | -0.25 |
| miR-26 | ENSDARG00000073724  | <i>nlr1</i>             | <i>NLR-A5, Nod5, Nod9</i>                                                                             | NLR family member X1                                                                        | 0.80/0.78 | -0.25 |
| miR-26 | ENSDARG00000088505  | <i>fam217b</i>          | <i>si:dkey-211h10.3</i>                                                                               | family with sequence similarity 217 member B                                                | 0.71/0.71 | -0.24 |
| miR-26 | ENSDARG00000088318  | <i>ubap2a</i>           | <i>ubap2, zgc:158449</i>                                                                              | ubiquitin associated protein 2a                                                             | 0.71/0.71 | -0.24 |
| miR-26 | ENSDARG0000008034   | <i>skib</i>             | <i>fc17g02, skiB, wu:fc17g02, wu:fk79g04</i>                                                          | v-ski avian sarcoma viral oncogene homolog b                                                | 0.78/0.79 | -0.24 |
| miR-26 | ENSDARG00000071548  | <i>jostl</i>            | <i>zgc:153682</i>                                                                                     | Josephin domain containing 1                                                                | 0.71/0.71 | -0.24 |
| miR-26 | ENSDARG00000070408  | <i>ccnd2b</i>           | <i>si:ch211-240j22.2</i>                                                                              | cyclin D2, b                                                                                | 0.72/0.71 | -0.23 |
| miR-26 | ENSDARG0000002192   | <i>aspn</i>             | <i>aspn1, bg13, wu:fk08c11, zgc:109936</i>                                                            | asporin (LRR class 1)                                                                       | 0.76/0.76 | -0.23 |

|              |                     |                   |                                                                                                                     |                                                                                                |           |       |
|--------------|---------------------|-------------------|---------------------------------------------------------------------------------------------------------------------|------------------------------------------------------------------------------------------------|-----------|-------|
| miR-26       | ENSDARG00000039892  | <i>gnpnat1</i>    | <i>im:7138655, zgc:112267</i>                                                                                       | glucosamine-phosphate N-acetyltransferase 1                                                    | 0.78/0.78 | -0.23 |
| miR-26       | ENSDARG00000062323  | <i>adam23a</i>    | <i>wu:fj40f01, wu:fq14a08</i>                                                                                       | ADAM metalloproteinase domain 23a                                                              | 0.95/0.94 | -0.23 |
| miR-26       | ENSDARG00000070545  | <i>top1l</i>      | <i>wu:fc66a02, zgc:136349</i>                                                                                       | DNA topoisomerase I, like                                                                      | 0.87/0.86 | -0.23 |
| miR-26       | ENSDARG00000025012  | <i>tpi1a</i>      | <i>DrTPI-A</i>                                                                                                      | triosephosphate isomerase 1a                                                                   | 0.72/0.73 | -0.23 |
| miR-26       | ENSDARG00000028396  | <i>fkbp5</i>      | <i>si:zc263a23.8, wu:fc31g11, wu:fl87b03, zgc:64082</i>                                                             | FKBP prolyl isomerase 5                                                                        | 0.82/0.83 | -0.23 |
| miR-26       | ENSDARG00000011727  | <i>b9d1</i>       | <i>im:6905750, im:7069491, wu:fc09g07, zgc:110733</i>                                                               | B9 protein domain 1                                                                            | 0.87/0.89 | -0.23 |
| miR-26       | ENSDARG00000038754  | <i>plk3</i>       | <i>cnk, wu:fi35f10</i>                                                                                              | polo-like kinase 3 (Drosophila)                                                                | 0.72/0.71 | -0.23 |
| miR-26       | ENSDARG00000042846  | <i>disp2</i>      | N/A                                                                                                                 | dispatched homolog 2 (Drosophila)                                                              | 0.84/0.83 | -0.23 |
| miR-26       | ENSDARG00000052975  | <i>ubqln4</i>     | <i>ataxin-1 ubiquitin-like interacting protein, ubin, wu:fb48e11, wu:fb54b10, wu:fi41e06, zgc:113928, zgc:66188</i> | ubiquilin 4                                                                                    | 0.81/0.80 | -0.23 |
| miR-26       | ENSDARG00000052950  | <i>arhgap23a</i>  | <i>sb:eu857</i>                                                                                                     | Rho GTPase activating protein 23a                                                              | 0.88/0.88 | -0.22 |
| miR-26       | ENSDARG00000000142  | <i>tmem267</i>    | <i>si:busm1-79m10.4, si:dz79m10.4, zgc:101064, C10H5orf28</i>                                                       | transmembrane protein 267                                                                      | 0.77/0.77 | -0.22 |
| miR-26       | ENSDARG00000003165  | <i>nr2f6b</i>     | <i>EAR2-B, fc72d04, nr2f6, wu:fc72d04, zgc:77260</i>                                                                | nuclear receptor subfamily 2, group F, member 6b                                               | 0.85/0.83 | -0.22 |
| miR-26       | ENSDARG00000059280  | <i>hoxd3a</i>     | <i>Z-56, hoxd3, im:7144208</i>                                                                                      | homeobox D3a                                                                                   | 0.90/0.90 | -0.22 |
| miR-26       | ENSDARG00000044485  | <i>sall4</i>      | <i>cb372, cb614, ik:tdsubc_2c1, sb:cb372, sb:cb614, wu:fa01g03, xx:tdsubc_2c1</i>                                   | spalt-like transcription factor 4                                                              | 0.94/0.93 | -0.22 |
| miR-26       | ENSDARG00000004218  | <i>rnd1b</i>      | <i>Rnd1a, rnd1l, wu:fk50c04, zgc:153089</i>                                                                         | Rho family GTPase 1b                                                                           | 0.78/0.78 | -0.22 |
| miR-26       | ENSDARG000000035578 | <i>hs3st1l2</i>   | <i>3-ost-5, z3-ost-5, zgc:136835</i>                                                                                | heparan sulfate (glucosamine) 3-O-sulfotransferase 1-like 2                                    | 0.76/0.75 | -0.22 |
| miR-26       | ENSDARG00000076163  | <i>col19a1</i>    | <i>si:dkey-49l3.2, stumpy, sty, zgc:153049</i>                                                                      | collagen, type XIX, alpha 1                                                                    | 0.77/0.76 | -0.22 |
| miR-26       | ENSDARG00000015734  | <i>aicda</i>      | <i>Aid</i>                                                                                                          | activation-induced cytidine deaminase                                                          | 0.72/0.73 | -0.22 |
| miR-26       | ENSDARG00000025535  | <i>clint1a</i>    | <i>clint1, enth, enthoproten, epn4, kiaa0171, wu:fa05f05, wu:fb97f11, wu:fc12e09, zgc:103447</i>                    | clathrin interactor 1a                                                                         | 0.72/0.72 | -0.22 |
| miR-26       | ENSDARG00000052535  | <i>ubxn10</i>     | <i>zgc:153648</i>                                                                                                   | UBX domain protein 10                                                                          | 0.72/0.72 | -0.22 |
| miR-26       | ENSDARG00000052011  | <i>rrad</i>       | <i>fi06a10, wu:fi06a10, zgc:63471</i>                                                                               | Ras-related associated with diabetes                                                           | 0.92/0.92 | -0.22 |
| miR-26       | ENSDARG00000060893  | <i>col8a2</i>     | <i>si:ch211-197n10.4</i>                                                                                            | collagen, type VIII, alpha 2                                                                   | 0.75/0.74 | -0.22 |
| miR-26       | ENSDARG00000059596  | <i>clip2</i>      | N/A                                                                                                                 | CAP-GLY domain containing linker protein 2                                                     | 0.74/0.74 | -0.22 |
| miR-26       | ENSDARG00000092692  | <i>pimr133</i>    | <i>si:dkey-197d18.1</i>                                                                                             | Pim proto-oncogene, serine/threonine kinase, related 133                                       | 0.73/0.75 | -0.22 |
| miR-26       | ENSDARG00000042732  | <i>tmem189</i>    | <i>zgc:101801</i>                                                                                                   | transmembrane protein 189                                                                      | -0.70     | -0.22 |
| miR-26       | ENSDARG00000039064  | <i>st3gal7</i>    | <i>SIAT5-r, ST3GalV-2, st3gal5-r2, st3gal5l, wu:fb60h07, zgc:153853</i>                                             | ST3 beta-galactoside alpha-2,3-sialyltransferase 7                                             | 0.84/0.84 | -0.22 |
| miR-26       | ENSDARG00000003109  | <i>rcan1a</i>     | <i>zgc:100963</i>                                                                                                   | regulator of calcineurin 1a                                                                    | 0.82/0.82 | -0.22 |
| miR-26       | ENSDARG00000057497  | <i>stk35l</i>     | <i>im:7138176, zgc:101750</i>                                                                                       | serine/threonine kinase 35, like                                                               | 0.78/0.78 | -0.21 |
| miR-26       | ENSDARG00000036171  | <i>rnase13</i>    | <i>Dr-RNase1, RNase ZF-3, im:6907218, zf-rnase-3</i>                                                                | ribonuclease like 3                                                                            | 0.79/0.79 | -0.21 |
| miR-26       | ENSDARG00000076052  | <i>sez6l2</i>     | <i>si:dkey-282h22.6</i>                                                                                             | seizure related 6 homolog (mouse)-like 2                                                       | 0.82/0.81 | -0.21 |
| miR-26       | ENSDARG00000036791  | <i>dnmt3bb.1</i>  | <i>cb633, dnmt3b, dnmt3b1, dnmt4</i>                                                                                | DNA (cytosine-5-)-methyltransferase 3 beta, duplicate b.1                                      | 0.86/0.86 | -0.21 |
| miR-26       | ENSDARG00000004724  | <i>tcea3</i>      | <i>zgc:77732</i>                                                                                                    | transcription elongation factor A (SII), 3                                                     | 0.74/0.72 | -0.21 |
| miR-26       | ENSDARG00000079783  | <i>isg20</i>      | <i>BX294110.1</i>                                                                                                   | interferon stimulated exonuclease gene                                                         | 0.77/0.78 | -0.21 |
| miR-26       | ENSDARG00000014386  | <i>galnt6</i>     | <i>fc23d02, fc56f12, wu:fc23d02, wu:fc56f12, zgc:77836</i>                                                          | UDP-N-acetyl-alpha-D-galactosamine:polypeptide N-acetylgalactosaminyltransferase 6 (GalNAc-T6) | 0.72/0.72 | -0.21 |
| miR-26       | ENSDARG00000075757  | <i>gig2e</i>      | <i>DreE, BX510940.2</i>                                                                                             | grass carp reovirus (GCRV)-induced gene 2e                                                     | 0.70/0.71 | -0.21 |
| miR-26       | ENSDARG00000074365  | <i>zgc:171901</i> | N/A                                                                                                                 | <i>zgc:171901</i>                                                                              | 0.75/0.76 | -0.21 |
| miR-26       | ENSDARG00000057665  | <i>sprn2</i>      | <i>PrP-rel-1, Sho2, sprnb, wu:fi12d11, zgc:123052</i>                                                               | shadow of prion protein 2                                                                      | 0.70/-    | -0.21 |
| miR-26       | ENSDARG00000073732  | <i>myh14</i>      | <i>si:ch211-120k19.2, si:ch211-120k19.3</i>                                                                         | myosin, heavy chain 14, non-muscle                                                             | 0.79/0.80 | -0.21 |
| <b>Total</b> | <b>513</b>          |                   |                                                                                                                     |                                                                                                |           |       |

\*The miTG score to miR-26a and miR-26b is presented separately.
